# Supplementary material
Source: PubMed Central journal article supplement (PMC6648299)
Supplement: ao9b00020_si_001.pdf [file ao9b00020_si_001.pdf]

## SUPPORTING INFORMATION(SI):

# Large-Scale Target Identification of Herbal Medicine Using a Reverse Docking Approach

*Haiping Zhang<sup>1,2 †</sup>, Jianbo Pan<sup>3 †</sup>, Xuli Wu<sup>4</sup>, Ai-Ren Zuo<sup>5</sup>, Yanjie Wei<sup>2\*</sup>, Zhi-Liang Ji<sup>1\*</sup>*

<sup>1</sup>State Key Laboratory of Stress Cell Biology, School of Life Sciences, Xiamen University, Xiamen, Fujian, 361102, PR China

<sup>2</sup>Joint Engineering Research Center for Health Big Data Intelligent Analysis Technology, Shenzhen Institutes of Advanced Technology, Chinese Academy of Sciences, Shenzhen, Guangdong Province, People's Republic of China, 518055

<sup>3</sup>Department of Ophthalmology, Johns Hopkins School of Medicine, Baltimore, MD, USA, 21205

<sup>4</sup>School of Medicine, Shenzhen University, Shenzhen, Guangdong Province, People's Republic of China, 518060

<sup>5</sup>Jiangxi University of Traditional Chinese Medicine, Nanchang, Jiangxi, China

<sup>†</sup>These authors have contributed equally as first authors.

\*Corresponding author: Zhi-Liang Ji: [appo@xmu.edu.cn](mailto:appo@xmu.edu.cn), Yanjie Wei: [yj.wei@siat.ac.cn](mailto:yj.wei@siat.ac.cn)

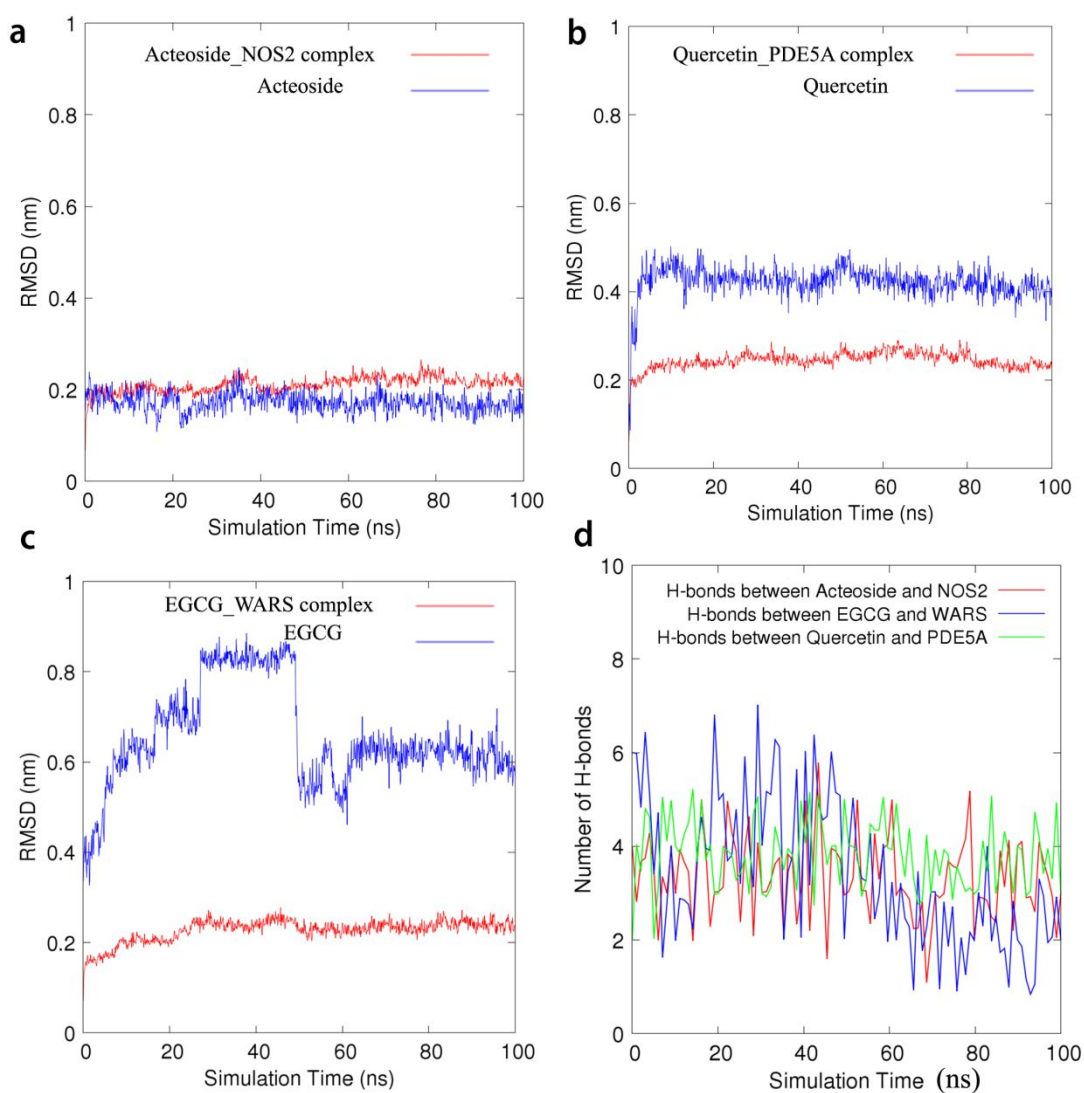

**Supplementary Figure S1.** Post simulation analyses by the MD simulation. With the initial structures as reference structures, the RMSD values of the simulation trajectories are shown in Panel a, b, c for of acteoside\_NOS2 (PDBID 4nos), quercetin\_PDE5A (PDBID 2h44), and EGCG\_WARS (PDBID 1r6t) complexes respectively. For the hydrogen bond numbers, only the hydrogen bonds between ligand and protein were counted. Panel c indicates that binding style of WARS (PDBID 1r6t) and EGCG has changes during the first 60 ns simulation, while become relative stable late. Panel d shows the number of hydrogen bonds formed between ligand and protein.

a Replicates of  
Acteoside\_NOS2 complex

RMSD: 0.224 nm

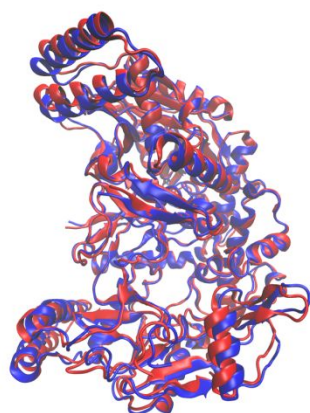

b Replicates of  
Quercetin\_PDE5A complex

RMSD: 0.265 nm

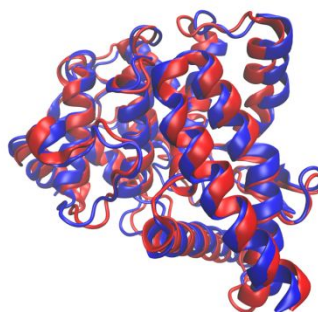

c Replicates of  
EGCG\_WARS complex

RMSD: 0.266 nm

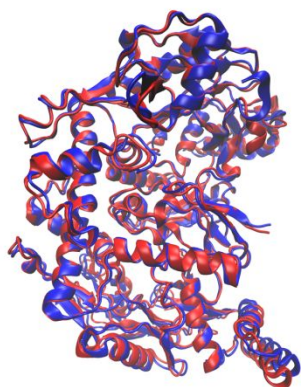

**Supplementary Figure S2.** Overlap protein conformation snapshot from two independent MD simulations. In order to ensure the robust of the MD simulation, we carry post simulation analyses for the other MD simulation which have the same simulation condition except a random initial velocity. With the initial structures as reference structures, the last frame conformations from the simulation trajectories are superposed. It was shown in Panel a, b, c for of acteoside\_NOS2 (PDBID 4nos), quercetin\_PDE5A (PDBID 2h44), and EGCG\_WARS (PDBID 1r6t) complexes respectively. The proteins in these 3 cases are pretty stable during the simulation, with RMSD value of 0.224nm, 0.265nm, 0.266nm for the superposed last frame protein conformations. It shows highly consistent with the Supplementary Figure S1, indicating the reliability of the MD simulation for these three systems.

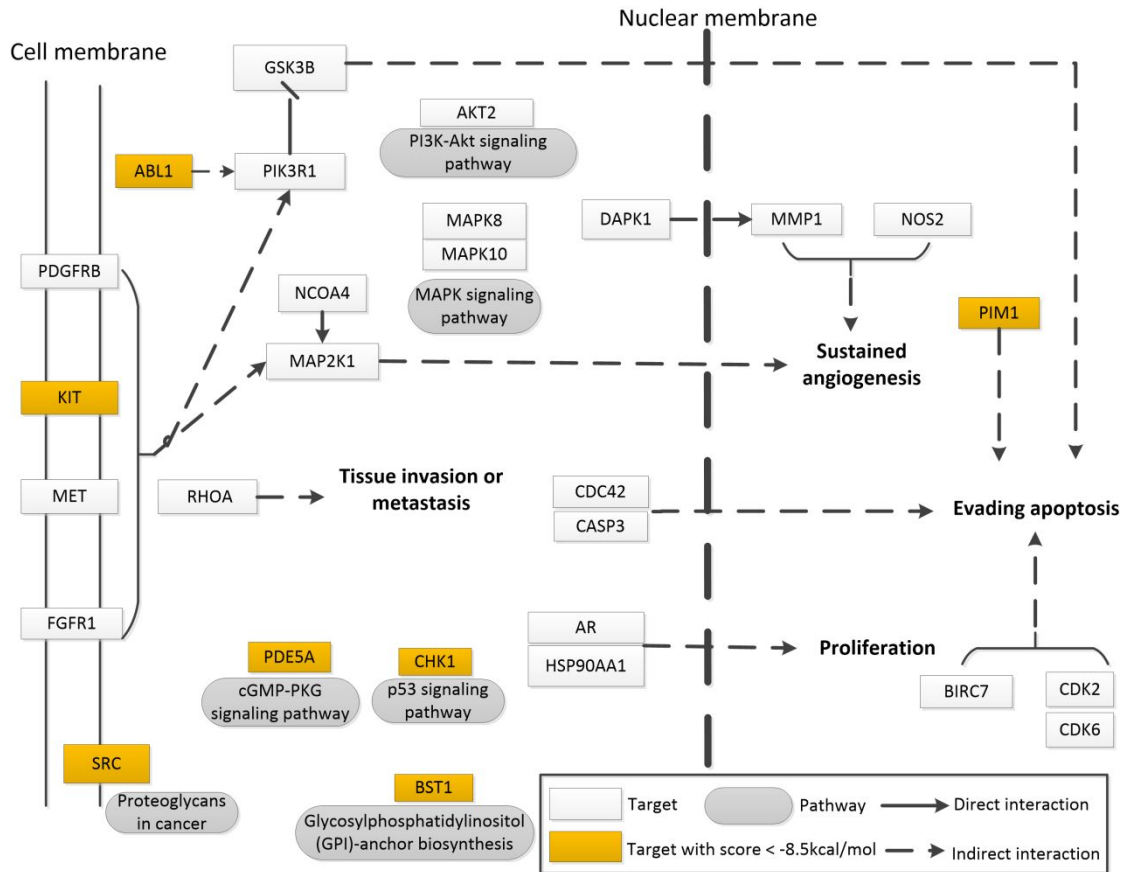

**Supplementary Figure S3.** A pharmacology network of quercetin was constructed by mapping the potential targets to KEGG pathway.

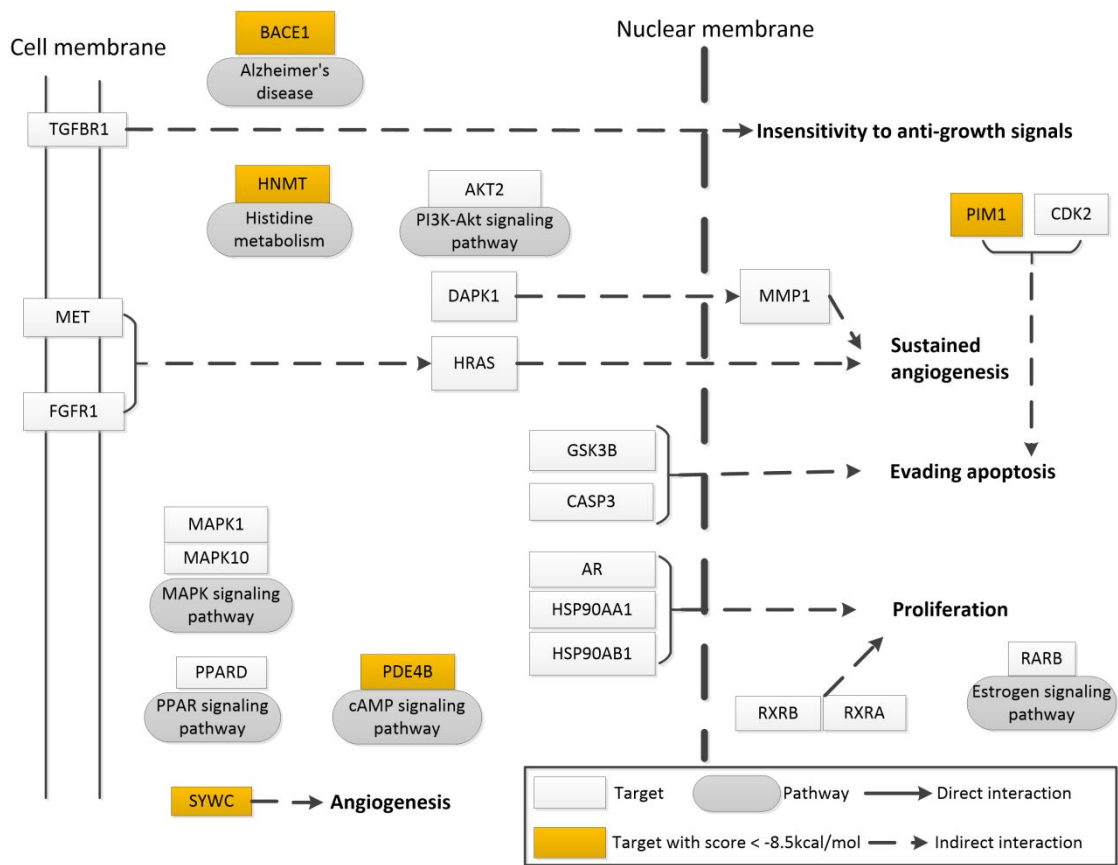

**Supplementary Figure S4.** A pharmacology network of EGCG was constructed by mapping the potential targets to the KEGG pathways.

**Table S1.** The list of highly potential targets of acetoside predicted by the pipeline. The gene names with bold font are known target according to reports.

| Name                                                        | Indications                                                                                                            | PDB ID | Vina score | Vina score#                                  | Full name of known ligand          | Ingredient target relation                                                                             |
|-------------------------------------------------------------|------------------------------------------------------------------------------------------------------------------------|--------|------------|----------------------------------------------|------------------------------------|--------------------------------------------------------------------------------------------------------|
|                                                             |                                                                                                                        |        | (Kcal/mol) | (comparative known ligand in PDB) (Kcal/mol) |                                    |                                                                                                        |
| <b>Nitric oxide synthase, inducible(NOS2)</b>               | Asthma;<br>Mucositis;<br>Migraine;<br>Neuropathic pain;<br>Inflammation;<br>Chronic obstructive pulmonary disease; etc | 4nos   | -10.3      | -10.1(HEM)                                   | PROTOPORPHYRIN IX CONTAINING FE    | Inhibitor <sup>1-2</sup> ;<br>Influence the activity of nitric oxide synthase <sup>3</sup> .           |
|                                                             |                                                                                                                        | 1nsi   | -9.5       | -10.6(HEM)                                   | PROTOPORPHYRIN IX CONTAINING FE    |                                                                                                        |
| <b>cAMP-specific 3,5-cyclic phosphodiesterase 4B (PDE4)</b> | Chronic obstructive pulmonary disease; Asthma                                                                          | 1ror   | -10.3      | -3.7(AMP)                                    | ADENOSINE MONOPHOSPHATE            | Inhibition activity against cAMP phosphodiesterase of Acetoside' analogs plantamajoside <sup>4-5</sup> |
|                                                             |                                                                                                                        | 1ro9   | -10.1      | -5.3(8BR)                                    | 8-BROMO-ADENOSINE-5'-MONOPHOSPHATE |                                                                                                        |

|                                                      |                                                                                                |      |      |           |                                                                                      |                                       |
|------------------------------------------------------|------------------------------------------------------------------------------------------------|------|------|-----------|--------------------------------------------------------------------------------------|---------------------------------------|
| Corticosteroid<br>11-beta-dehydrogenase isozyme 1    | Non-insulin dependent diabetes;<br>Rheumatoid arthritis;<br>Diabetes mellitus;<br>Obesity; etc | 2bel | -9.9 | -6.6(NAP) | NADP NICOTINAMIDE-ADENINE-DINUCLEOTIDE PHOSPHATE                                     | Unknown                               |
| <b>Glutathione reductase, mitochondrial(GSR)</b>     | Nutritional supplementation                                                                    | 1dnc | -9.8 | -9.2(FAD) | FLAVIN-ADENINE DINUCLEOTIDE                                                          | Neuroprotective activity <sup>6</sup> |
| ADP-ribosyl cyclase 2                                | Hematological neoplasm;<br>Multiple myeloma                                                    | 1isj | -9.7 | -4.1(NMN) | BETA-NICOTINAMIDE RIBOSE MONOPHOSPHATE                                               | Unknown                               |
|                                                      |                                                                                                | 1isg | -9.4 | -3.9(AGS) | PHOSPHOTHIOPHOSPHORIC ACID-ADENYLATE ESTER                                           |                                       |
|                                                      |                                                                                                | 1ish | -9   | -1.6(ENP) | ETHENO-NADP                                                                          |                                       |
| Inosine-5-monophosphate dehydrogenase 2 (IMPDH2)     | Autoimmune disease;<br>Transplant rejection; cancer                                            | 1b3o | -9.5 | -2.6(SAE) | SELENAZOLE-4-CARBOXYAMIDE-ADENINE DINUCLEOTIDE                                       | Unknown                               |
| Leukotriene A-4 hydrolase                            | Inflammation;<br>Cancer; etc                                                                   | 1gw6 | -9.4 | -4.6(BES) | 2-(3-AMINO-2-HYDROXY-4-PHENYL-BUTYRYLAMINO)-4-METHYL-PENTANOIC ACID                  | Unknown                               |
| Proto-oncogene serine/threonine-protein kinase Pim-1 | Cancer                                                                                         | 2bik | -9.4 | -9.2(BI1) | 3-{1-[3-(DIMETHYLAMINO)PROPYL]-1H-INDOL-3-YL}-4-(1H-INDOL-3-YL)-1H-PYRROLE-2,5-DIONE | Unknown                               |

|                                                     |                                                             |      |      |           |                                                                                                                                                                                                                       |         |
|-----------------------------------------------------|-------------------------------------------------------------|------|------|-----------|-----------------------------------------------------------------------------------------------------------------------------------------------------------------------------------------------------------------------|---------|
| Beta-secretase 1                                    | Alzheimers disease                                          | 2g94 | -9.4 | -5.8(ZPQ) | N~2~-[(2R,4S,5S)-5-{{N-{{(3,5-DIMETHYL-1H-PYRAZOL-1-YL)METHOXY}CARBONYL}-3-(METHYLSULFONYL)-L-ALANYL}AMINO}-4-HYDROXY-2,7-DIMETHYLOCTANOYL]-N-ISOBUTYL-L-VALINAMIDE                                                   | Unknown |
|                                                     |                                                             | 1m4h | -9.3 | -3.0(1OL) | (2R,4S,5S)-5-amino-4-hydroxy-2,7-dimethyloctanoic acid                                                                                                                                                                |         |
| Renin                                               | Glaucoma; Renal disease; Hypertension; etc                  | 1bim | -9.3 | -7.1(0QB) | (2S)-2-[(2-amino-1,3-thiazol-4-yl)methyl]-N~1~-{(1S,2S)-1-(cyclohexylmethyl)-2-hydroxy-2-[(3R)-1,5,5-trimethyl-2-oxopyrrolidin-3-yl]ethyl}-N~4~-[2-(dimethylamino)-2-oxoethyl]-N~4~-[(1S)-1-phenylethyl]butanediamide | Unknown |
| Cathepsin K                                         | Multiple sclerosis; Asthma; Cancer; Autoimmune disease; etc | 1tu6 | -9.3 | 0.2(FSP)  | [1-(4-FLUOROBENZYL)CYCLOBUTYL]METHYL (1S)-1-[OXO(1H-PYRAZOL-5-YLAMINO)ACETYL]PENTYL CARBAMATE                                                                                                                         | Unknown |
| Macrophage metalloelastase                          | Chronic obstructive pulmonary disease                       | 1utz | -9.3 | -8.2(PF3) | (2R)-3-({[4-[(PYRIDIN-4-YL)PHENYL]-THIEN-2-YL}CARBOXAMIDO)(PHENYL)PROPANOIC ACID                                                                                                                                      | Unknown |
| Phenylalanine-4-hydroxylase                         | Phenylketonuria; Hypertension; etc                          | 1dmw | -9.1 | -5.0(HBI) | 7,8-DIHYDROBIOPTERIN                                                                                                                                                                                                  | Unknown |
| Hydroxyacyl-coenzyme A dehydrogenase, mitochondrial | Parkinsons disease, chronic fatigue syndrome,               | 1f12 | -9.1 | -3.4(3HC) | 3-HYDROXYBUTANOYL-COENZYME A                                                                                                                                                                                          | Unknown |



|                                            |                                                                                                         |      |      |           |                                                                                                                            |                                 |
|--------------------------------------------|---------------------------------------------------------------------------------------------------------|------|------|-----------|----------------------------------------------------------------------------------------------------------------------------|---------------------------------|
|                                            | Alzheimers disease and cardiovascular disease.                                                          | 1f0y | -8.8 | -3.4(CAA) | ACETOACETYL-COENZYME A                                                                                                     |                                 |
| Proto-oncogene tyrosine-protein kinase Src | Hypercalcemia; Cancer; Osteoporosis; Cerebrovascular ischemia; Bone metastases; Metastasis; Solid tumor | 2bdj | -9.1 | -7.5(HET) | 3-[2-(2-CYCLOPENTYL-6-{[4-(DIMETHYLPHOSPHORYL)PHENYL]AMINO}-9H-PURIN-9-YL)ETHYL]PHENOL                                     | Unknown                         |
| Ornithine aminotransferase, mitochondrial  | Cancer                                                                                                  | 2can | -9.1 | -4.8(PLP) | PYRIDOXAL-5'-PHOSPHATE                                                                                                     | Unknown                         |
| Prothrombin                                | Deep vein thrombosis; Wound healing; etc                                                                | 1ad8 | -9   | -2.3(MDL) | [DEHYDROXY-N-METHYL-TYROSYL-PROLINYL]-[4,4,5,5,5-PENTAFLUORO-3-OXY-1-[3-INDOLYL]-PENT-2-YL]AMINE                           | Unknown                         |
|                                            |                                                                                                         | 1bmn | -9   | -0.3(BM9) | [S-(R*,R*)]-1-(AMINOIMINOMETHYL)-N-[[1-[N-(2-NAPHTHALENYLSULFONYL)-L-SERYL]-3-PYRROLIDINYL]METHYL]-3-PIPERIDENECARBOXAMIDE |                                 |
| <b>Aldose reductase (AKR1B1)</b>           | Neuropathy; Central nervous system disease; Diabetic                                                    | 1az1 | -9   | -8.1(NAP) | NADP NICOTINAMIDE-ADENINE-DINUCLEOTIDE PHOSPHATE                                                                           | Strong inhibitor <sup>7-8</sup> |



|                                 |                                                                                          |      |      |           |                                                                    |         |
|---------------------------------|------------------------------------------------------------------------------------------|------|------|-----------|--------------------------------------------------------------------|---------|
| Ras-related protein Rab-9A      | Psoriasis;Cancer; Rheumatoid arthritis;Cardiac failure;Inflammation;etc                  | 1wms | -8.9 | -4.5(GDP) | GUANOSINE-5'-DIPHOSPHATE                                           | Unknown |
| Carbonic anhydrase 2            | Parkinsons disease; chronic fatigue syndrome; Alzheimers disease;etc.                    | 1bnw | -8.8 | -4.1(TPD) | N-(2-THIENYLMETHYL)-2,5-THIOPHENEDISULFONAMIDE                     | Unknown |
| Glycogen synthase kinase-3 beta | Central nervous system disease;Inflammation;etc                                          | 1j1c | -8.8 | -4.7(ADP) | ADENOSINE-5'-DIPHOSPHATE                                           | Unknown |
|                                 |                                                                                          | 1j1b | -8.7 | -4.6(ANP) | PHOSPHOAMINOPHOSPHONIC ACID-ADENYLATE ESTER                        |         |
| Heat shock protein HSP 90-alpha | Alzheimers disease;Renal disease;Lipid metabolism disorder;etc                           | 1uyk | -8.8 | 0.8(PUX)  | 8-BENZO[1,3]DIOXOL-,5-YLMETHYL-9-BUTYL-2-FLUORO-9H-PURIN-6-YLAMINE | Unknown |
| Thymidylate kinase              | Alzheimers disease;Non-insulin dependent diabetes;Inflammation;Prostate tumor;Cancer;etc | 1e9d | -8.7 | -4.9(ATM) | 3'-AZIDO-3'-DEOXYTHYMIDINE-5'-MONOPHOSPHATE                        | Unknown |

|                                              |                                                                       |       |      |           |                                                                                             |         |
|----------------------------------------------|-----------------------------------------------------------------------|-------|------|-----------|---------------------------------------------------------------------------------------------|---------|
| Phosphoenolpyruvate carboxykinase, cytosolic | Ariboflavinosis                                                       | 1khh  | -8.7 | -5.6(GCP) | PHOSPHOMETHYLPHOSPHONIC ACID GUANYLATE ESTER                                                | Unknown |
| Cyclin-dependent kinase 2                    | Ariboflavinosis                                                       | 1oi9* | -8.7 | none      |                                                                                             | Unknown |
|                                              |                                                                       | 1dm2  | -8.5 | -7.8(HMD) | 4-(5-AMINO-4-OXO-4H-PYRAZOL-3-YL)-2-BROMO-4,5,6,7-TETRAHYDRO-3AH-PYRROLO[2,3-C]AZEPIN-8-ONE |         |
| Cyclin-A2                                    | T-cell lymphoma;Autoimmune disease;Inflammation;etc                   | 1oi9* | -8.7 | none      |                                                                                             | Unknown |
| Purine nucleoside phosphorylase              | Bacillus anthracis infection                                          | 1rfg  | -8.7 | -0.9(SO4) | SULFATE ION                                                                                 | Unknown |
| Carbonic anhydrase 2                         | Parkinsons disease; chronic fatigue syndrome; Alzheimers disease; etc | 1i9p  | -8.6 | -4.2(IOE) | 4-(AMINOSULFONYL)-N-[(2,4,6-TRIFLUOROPHENYL)METHYL]-BENZAMIDE                               | Unknown |
| Death-associated protein kinase 1            | Psoriasis;Cancer; Rheumatoid arthritis;etc                            | 1ig1  | -8.6 | -2.3(ANP) | PHOSPHOAMINOPHOSPHONIC ACID-ADENYLATE ESTER                                                 | Unknown |

|                                                                                           |          |                                         |      |      |           |                                |         |
|-------------------------------------------------------------------------------------------|----------|-----------------------------------------|------|------|-----------|--------------------------------|---------|
| Ras-related botulinum substrate 1                                                         | C3 toxin | Toxicity;Metabolic disorder;Cancer; etc | 1ryf | -8.5 | -4.0(GDP) | GUANOSINE-5'-DIPHOSPHATE       | Unknown |
| Pancreatic alpha-amylase                                                                  |          | Alzheimers disease                      | 1xcw | -8.5 | -4.0(3SA) | ACARBOSE DERIVED TRISACCHARIDE | Unknown |
| Dual specificity protein kinase CLK1                                                      |          | Thromboembolism                         | 1z57 | -8.5 | -7.4(DBQ) | DEBROMOHYMENIALDISINE          | Unknown |
| # vina score determined for known ligand-protein complex downloaded from the PDB database |          |                                         |      |      |           |                                |         |
| * the PDB structure contains two protein units.                                           |          |                                         |      |      |           |                                |         |

**Table S2.** The list of highly potential targets of quercetin predicted by the pipeline. The gene names with bold font are known target according to reports.

| Name                                                      | Indication                                                                                 | PDB id | Vina score | Vina score#                                  | Full name of known ligand                                                                                                                              | Ingredient target relation                                  |
|-----------------------------------------------------------|--------------------------------------------------------------------------------------------|--------|------------|----------------------------------------------|--------------------------------------------------------------------------------------------------------------------------------------------------------|-------------------------------------------------------------|
|                                                           |                                                                                            |        | (Kcal/mol) | (comparative known ligand in PDB) (Kcal/mol) |                                                                                                                                                        |                                                             |
| <b>cGMP-specific 3,5-cyclic phosphodiesterase (PDE5A)</b> | Anal fissure; Raynauds disease; Cardiac failure; Thrombosis; Vascular disease; Cancer; etc | 2h44   | -10.2      | -12.0(7CA)                                   | 5,7-DIHYDROXY-2-(4-METHOXYPHENYL)-8-(3-METHYLBUTYL)-4-OXO-4H-CHROMEN-3-YL<br>6-DEOXY-ALPHA-L-MANNOPYRANOSIDE                                           | Inhibitor <sup>9</sup>                                      |
| Mast/stem cell growth factor receptor(SGFR or KIT)        | Pancreas tumor; Ovary tumor; Cancer; Mastocytosis; Gastrointestinal tumor                  | 1pkg   | -10.1      | -0.9(ADP) ‡                                  | ADENOSINE-5'-DIPHOSPHATE                                                                                                                               | Inhibitor of EGFR (structure similar to SGFR) <sup>10</sup> |
| <b>Serine/threonine-protein kinase (Chk1)</b>             | Cancer; Solid tumor                                                                        | 2e9v   | -9.6       | -8.0(85A)                                    | 18-CHLORO-2-OXO-17-[(PYRIDIN-4-YLMETHYL)AMINO]-2,3,11,12,13,14-HEXAHYDRO-1H,10H-4,8-(AZENO)-9,15,1,3,6-BENZODIOXATRIAZACYCLOHEPTADECINE-7-CARBONITRILE | Inhibitor <sup>11</sup>                                     |
|                                                           |                                                                                            | 2e9u   | -8.9       | -9.3(A25)                                    | 18-CHLORO-11,12,13,14-TETRAHYDRO-1H,10H-8,4-(AZENO)-9,15,1,3,6-BENZODIOXATRIAZACYCLOHEPTADECIN-2-ONE                                                   |                                                             |

|                                                             |                                               |      |      |             |                                                                                                                                      |                                                    |
|-------------------------------------------------------------|-----------------------------------------------|------|------|-------------|--------------------------------------------------------------------------------------------------------------------------------------|----------------------------------------------------|
| <b>ADP-ribosyl cyclase 2</b>                                | Hematological neoplasm; Multiple myeloma      | 1ish | -9.3 | -1.6(ENP) ‡ | ETHENO-NADP                                                                                                                          | Inhibit ADP-ribosyl-cyclase activity <sup>12</sup> |
|                                                             |                                               | 1isj | -8.6 | -4.1(E22)   | BETA-NICOTINAMIDE RIBOSE MONOPHOSPHATE                                                                                               |                                                    |
| <b>Proto-oncogene tyrosine-protein kinase Src(SRC)</b>      | Hypercalcemia; Cancer; etc                    | 2bdj | -9.3 | -7.5(HET)   | 3-[2-(2-CYCLOPENTYL-6- {[4-(DIMETHYLPHOSPHORYL)PHE NYL]AMINO}-9H-PURIN-9-YL)ETHYL]PHENOL                                             | Inhibitor <sup>13</sup>                            |
| <b>cAMP-specific 3,5-cyclic phosphodiesterase 4B(PDE4B)</b> | Chronic obstructive pulmonary disease; Asthma | 1ror | -9.1 | -3.7(AMP) ‡ | ADENOSINE MONOPHOSPHATE                                                                                                              | Inhibitor <sup>14</sup>                            |
|                                                             |                                               | 1ro9 | -9   | -5.3(8BR)   | 8-BROMO-ADENOSINE-5'-MONOPHOSPHATE                                                                                                   |                                                    |
|                                                             |                                               | 1y2j | -8.8 | none        |                                                                                                                                      |                                                    |
| Proto-oncogene tyrosine-protein kinase LCK                  | Psoriasis; Cancer; Autoimmune disease; etc    | 1qpd | -9   | -8.8(STU)   | STAUROSPORINE                                                                                                                        | Unknown                                            |
|                                                             |                                               | 3bys | -8.9 | -11.0(AM5)  | 4-methyl-N~3~-(2- {[4-(4-methylpiperazin-1-yl)phenyl]amino}pyrimidin-5-yl)-N~1~-[3-(trifluoromethyl)phenyl]benzene-1,3-dicarboxamide |                                                    |

|                                                              |                                                                                                                  |      |      |           |                                                                                  |         |
|--------------------------------------------------------------|------------------------------------------------------------------------------------------------------------------|------|------|-----------|----------------------------------------------------------------------------------|---------|
| Tyrosine-prot<br>ein kinase<br>JAK2                          | Psoriasis;<br>Cancer;<br>Rheumatoid<br>arthritis;<br>Pulmonary<br>hypertension;<br>Myeloid<br>leukemia;etc       | 2b7a | -9   | -9.9(IZA) | 2-TERT-BUTYL-9-FLUORO-3,6-DIHYDRO-7H-BENZ[H]-IMIDA<br>Z[4,5-F]ISOQUINOLINE-7-ONE | Unknown |
| Glutathione<br>S-transferase<br>A1                           | Nutritional<br>supplementatio<br>n                                                                               | 1guh | -8.9 | -5.0(GSB) | S-BENZYL-GLUTATHIONE                                                             | Unknown |
| Aldose<br>reductase                                          | Neuropathy;<br>Diabetic<br>neuropathy;<br>Diabetic<br>complication;<br>Central nervous<br>system disease;<br>etc | 2dux | -8.9 | -6.8(NAP) | NADP<br>NICOTINAMIDE-ADENINE-DINUCLEOTIDE<br>PHOSPHATE                           | Unknown |
| Corticosteroi<br>d<br>11-beta-dehy<br>drogenase<br>isozyme 1 | Non-insulin<br>dependent<br>diabetes;<br>Obesity; etc                                                            | 2bel | -8.8 | -6.6(NAP) | NADP<br>NICOTINAMIDE-ADENINE-DINUCLEOTIDE<br>PHOSPHATE                           | Unknown |



|                                                            |                                                                        |      |      |           |                                                                                                                                     |         |
|------------------------------------------------------------|------------------------------------------------------------------------|------|------|-----------|-------------------------------------------------------------------------------------------------------------------------------------|---------|
| Vascular endothelial growth factor receptor 2              | Angiogenesis disorder; Melanoma; Cancer; etc                           | 1y6b | -8.7 | -7.9(AAX) | N-(CYCLOPROPYLMETHYL)-4-(METHYLOXY)-3-({5-[3-(3-PYRIDINYL)PHENYL]-1,3-OXAZOL-2-YL} AMINO)BENZENESULFONAMIDE                         | Unknown |
| Proto-oncogene tyrosine-protein kinase ABL1                | Nutritional supplementation                                            | 2f4j | -8.7 | -8.1(VX6) | CYCLOPROPANECARBOXYLIC ACID {4-[4-(4-METHYL-PIPERAZIN-1-YL)-6-(5-METHYL-2H-PYRAZOL-3-YLAMINO)-PYRIMIDIN-2-YLSULFANYL]-PHENYL}-AMIDE | Unknown |
| Estradiol 17-beta-dehydrogenase 1                          | Parkinsons disease, chronic fatigue syndrome, Alzheimers disease ; etc | 1equ | -8.6 | -6.7(EQI) | EQUILIN                                                                                                                             | Unknown |
| Thymidylate synthase                                       | Small-cell lung cancer; Solid tumor; Cancer; etc                       | 1i00 | -8.6 | -5.1(D16) | TOMUDEX                                                                                                                             | Unknown |
| Dual specificity mitogen-activated protein kinase kinase 1 | Colon tumor; Melanoma; Cancer; etc                                     | 1s9j | -8.6 | -4.9(ATP) | ADENOSINE-5'-TRIPHOSPHATE                                                                                                           | Unknown |

|                                                             |                                                   |      |      |             |                                                                                                                  |                                           |
|-------------------------------------------------------------|---------------------------------------------------|------|------|-------------|------------------------------------------------------------------------------------------------------------------|-------------------------------------------|
| Adenosine kinase                                            | Septic shock; Pain; Inflammation; Anesthesia; etc | 1bx4 | -8.5 | -6.5(ADN)   | ADENOSINE                                                                                                        | Unknown                                   |
| S-methyl-5-thioadenosine phosphorylase                      | Nutritional supplementation                       | 1sd2 | -8.5 | -3.1(MTH) ‡ | 2-(4-AMINO-PYRROLO[2,3-D]PYRIMIDIN-7-YL)-5-METHYLSULFANYLMETHYL-TETRAHYDRO-FURAN-3,4-DIOL                        | Unknown                                   |
| <b>Proto-oncogene serine/threonine-protein kinase Pim-1</b> | Cancer                                            | 1yxt | -8.5 | 0.5(ANP) ‡  | PHOSPHOAMINOPHOSPHONIC ACID-ADENYLATE ESTER                                                                      | inhibitor <sup>15</sup>                   |
| <b>Estrogen receptor beta(ESR2)</b>                         | Osteoporosis in post-menopausal women             | 2qtu | -8.5 | -7.0(3AS)   | (3aS,4R,9bR)-2,2-difluoro-4-(4-hydroxyphenyl)-6-(methoxymethyl)-1,2,3,3a,4,9b-hexahydrocyclopenta[c]chromen-8-ol | Phytoestrogen-like activity <sup>16</sup> |

# vina score determined for known ligand-protein complex downloaded from the PDB database.

‡ Some of the co-crystallized ligands have very low binding energy towards their targets, it indicates the score function of Vina may be failed in some cases. This often happens for the cases contain a chemical group that rarely happened in the training dataset of vina score.

**Table S3.** The list of highly potential targets of EGCG predicted by the pipeline. The gene names with bold front are known targets according to the reports.

| Name                                                               | Indication                                                                                                        | PDB ID | Vina score | Vina score#                                  | Full name of known ligand                                                            | Ingredient target relation               |
|--------------------------------------------------------------------|-------------------------------------------------------------------------------------------------------------------|--------|------------|----------------------------------------------|--------------------------------------------------------------------------------------|------------------------------------------|
|                                                                    |                                                                                                                   |        | (Kcal/mol) | (comparative known ligand in PDB) (Kcal/mol) |                                                                                      |                                          |
| <b>Tryptophanyl-tRNA synthetase, cytoplasmic (WARS)</b>            | Promoting healthy sleep, enhancing mental and emotional well-being, managing pain tolerance, and managing weight. | 1r6t   | -10.2      | -8.4(TYM)                                    | TRYPTOPHANYL-5'AMP                                                                   | Downregulated by EGCG <sup>17</sup>      |
| <b>Proto-oncogene serine/threonine-protein kinase Pim-1 (PIM1)</b> | Cancer                                                                                                            | 2bik   | -10.1      | -9.2(BI1)                                    | 3-{1-[3-(DIMETHYLAMINO)PROPYL]-1H-INDOL-3-YL}-4-(1H-INDOL-3-YL)-1H-PYRROLE-2,5-DIONE | Activity decreased by EGCG <sup>18</sup> |
|                                                                    |                                                                                                                   | 1xws   | -10        | -9.3(BI1)                                    | 3-{1-[3-(DIMETHYLAMINO)PROPYL]-1H-INDOL-3-YL}-4-(1H-INDOL-3-YL)-1H-PYRROLE-2,5-DIONE | Up-regulated by EGCG <sup>19</sup>       |
|                                                                    |                                                                                                                   | 1yxu   | -9.8       | -3.2(AMP)                                    | ADENOSINE MONOPHOSPHATE                                                              |                                          |
| <b>Beta-secretase 1</b>                                            | Alzheimers disease                                                                                                | 1m4h   | -9.9       | -3.0(1OL)                                    | (2R,4S,5S)-5-amino-4-hydroxy-2,7-dimethyl octanoic acid                              | Anti-β-secretase activity <sup>20</sup>  |
|                                                                    |                                                                                                                   | 2g94   | -9.4       | -5.8(ZPQ)                                    |                                                                                      |                                          |

|                                                |                                                                                              |      |      |           |                                                                         |                                                 |
|------------------------------------------------|----------------------------------------------------------------------------------------------|------|------|-----------|-------------------------------------------------------------------------|-------------------------------------------------|
| cAMP-specific 3,5-cyclic phosphodiesterase 4B  | Chronic obstructive pulmonary disease; Asthma                                                | 1ror | -9.8 | -3.7(AMP) | ADENOSINE MONOPHOSPHATE                                                 | Unknown                                         |
| <b>Histamine N-methyltransferase</b>           | Acute malarial attacks in non-immune subjects.                                               | 1jqd | -9.2 | -4.8(SAH) | S-ADENOSYL-L-HOMOCYSTEINE                                               | Inhibitor of methyltransferase <sup>21-22</sup> |
| Estradiol 17-beta-dehydrogenase 1              | Parkinsons disease, chronic fatigue syndrome, Alzheimers disease and cardiovascular disease. | 1i5r | -9.1 | -9.3(HYC) | O5'-[9-(3,17B-DIHYDROXY-1,3,5(10)-ESTRATRIEN-16B-YL)-NONANOYL]ADENOSINE | Unknown                                         |
|                                                |                                                                                              | 1equ | -8.8 | -6.7(EQI) | EQUILIN                                                                 |                                                 |
| Corticosteroid 11-beta-dehydrogenase isozyme 1 | Non-insulin dependent diabetes; Rheumatoid arthritis; Diabetes mellitus; Obesity; etc        | 2bel | -9.1 | -6.6(NAP) | NADP NICOTINAMIDE-ADENINE-DINUCLEOTIDE PHOSPHATE                        | Unknown                                         |
|                                                |                                                                                              | 3ch6 | -8.5 | -6.7(NAP) | NADP NICOTINAMIDE-ADENINE-DINUCLEOTIDE PHOSPHATE                        |                                                 |
| Leukotriene A-4 hydrolase                      | Inflammation; Cancer; etc                                                                    | 1gw6 | -8.8 | -4.6(BES) | 2-(3-AMINO-2-HYDROXY-4-PHENYL-BUTYRYLAMINO)-4-METHYL-PENTANOIC ACID     | Potential target <sup>23</sup>                  |
| <b>Ornithine aminotransferase,</b>             | Cancer                                                                                       | 2can | -8.8 | -4.8(PLP) | PYRIDOXAL-5'-PHOSPHATE                                                  | Decreases expression <sup>24</sup>              |

|                                                         |                                                                                                                |      |      |            |                                                                                                                |                                      |
|---------------------------------------------------------|----------------------------------------------------------------------------------------------------------------|------|------|------------|----------------------------------------------------------------------------------------------------------------|--------------------------------------|
| <b>mitochondrial</b>                                    |                                                                                                                |      |      |            |                                                                                                                |                                      |
| <b>Peroxisome proliferator-activated receptor alpha</b> | Syndrome X; Lipid metabolism disorder; Congestive heart failure; Diabetes mellitus; Obesity; Inflammation; etc | 1k7l | -8.7 | -9.9(544)  | 2-(1-METHYL-3-OXO-3-PHENYL-PROPYLAMINO)-3-{4-[2-(5-METHYL-2-PHENYL-OXAZOL-4-YL)-ETHOXY]-PHENYL}-PROPIONIC ACID | Activation of PPAalpha <sup>25</sup> |
| Sorbitol dehydrogenase                                  | Diabetic complication                                                                                          | 1pl6 | -8.7 | -2.8(572)  | 4-[2-(HYDROXYMETHYL)PYRIMIDIN-4-YL]-N,N-DIMETHYLPIPERAZINE-1-SULFONAMIDE                                       | Unknown                              |
| Proto-oncogene tyrosine-protein kinase LCK              | Psoriasis; Cancer; Inflammation; Multiple sclerosis; Autoimmune disease; etc                                   | 1qpj | -8.7 | -10.2(STU) | STAUROSPORINE                                                                                                  | Unknown                              |
| <b>Macrophage metalloelastase</b>                       | Chronic obstructive pulmonary disease                                                                          | 1ros | -8.7 | -7.8(DEO)  | 2-[2-(1,3-DIOXO-1,3-DIHYDRO-2H-ISOINDOL-2-YL)ETHYL]-4-(4'-ETHOXY-1,1'-BIPHENYL-4-YL)-4-OXOBUTANOIC ACID        | Inhibitor <sup>26</sup>              |
| ADP-ribosyl cyclase 2                                   | Hematological neoplasm; Multiple myeloma                                                                       | 1ish | -8.6 | -1.6(ENP)  | ETHENO-NADP                                                                                                    | Unknown                              |
|                                                         |                                                                                                                | 1isj | -8.5 | -4.1(NMN)  | BETA-NICOTINAMIDE RIBOSE MONOPHOSPHATE                                                                         |                                      |

|                                                                                           |                                                                                                              |      |      |            |                                                                                                                         |                                                         |
|-------------------------------------------------------------------------------------------|--------------------------------------------------------------------------------------------------------------|------|------|------------|-------------------------------------------------------------------------------------------------------------------------|---------------------------------------------------------|
| <b>Glutathione S-transferase A3</b>                                                       | For nutritional supplementation, also for treating dietary shortage or imbalance                             | 1tdi | -8.6 | -2.9(GSH)  | GLUTATHIONE                                                                                                             | Enhance the detoxification of carcinogens <sup>27</sup> |
| Riboflavin kinase                                                                         | For the treatment of ariboflavinosis (vitamin B2 deficiency).                                                | 1p4m | -8.5 | -4.1(FMN)  | FLAVIN MONONUCLEOTIDE                                                                                                   | Unknown                                                 |
| Dipeptidyl peptidase 4                                                                    | Rheumatoid arthritis; Diabetes mellitus; Non-insulin dependent diabetes; Autoimmune disease; Immune disorder | 1u8e | -8.5 | None       |                                                                                                                         | Unknown                                                 |
| Kinesin-like protein KIF11                                                                | Melanoma; Hodgkins disease; cancer                                                                           | 1yrs | -8.5 | -5.3(ADP)  | ADENOSINE-5'-DIPHOSPHATE                                                                                                | Unknown                                                 |
| Angiotensin-1 receptor                                                                    | Retinopathy; Ovary tumor; Cancer                                                                             | 2p4i | -8.5 | -11.1(MR9) | 4-METHYL-3-({3-[2-(METHYLAMINO)PYRIMIDIN-4-YL]PYRIDIN-2-YL}OXY)-N-[2-MORPHOLIN-4-YL-5-(TRIFLUOROMETHYL)PHENYL]BENZAMIDE | Unknown                                                 |
| # vina score determined for known ligand-protein complex downloaded from the PDB database |                                                                                                              |      |      |            |                                                                                                                         |                                                         |

**Table S4.** Post simulation analyses for critical residues which involve in the binding interface of NOS2 (PDBID 4nos) with Acteoside, PDE5A (PDBID 2h44) with Quercetin, and WARS (PDBID 1r6t) with EGCG, respectively by g\_mmpbsa program. Here only the residues that have free energy contribution larger than 3 kJ/mol or smaller than -3 kJ/mol were listed. The residue IDs are original IDs in the corresponding PDB without renumber.

| <b>Protein-ligand</b>              | <b>Residue name and ID</b> | <b>Free energy contribution( kJ/mol)</b> |
|------------------------------------|----------------------------|------------------------------------------|
| <b>NOS2-Acteoside (PDBID 4nos)</b> | TRP-194                    | -9.63                                    |
|                                    | ARG-199                    | -4.9014                                  |
|                                    | CYS-200                    | -7.1893                                  |
|                                    | ILE-201                    | -9.3462                                  |
|                                    | ARG-203                    | -3.5962                                  |
|                                    | ARG-266                    | -3.8567                                  |
|                                    | PRO-350                    | -3.2311                                  |
|                                    | PHE-369                    | -5.6609                                  |
|                                    | TRP-372                    | -14.5526                                 |
|                                    | TYR-373                    | -5.3046                                  |
|                                    | MET-374                    | -9.5886                                  |
|                                    | GLU-377                    | 21.5321                                  |
|                                    | ARG-381                    | -12.2301                                 |
|                                    | ASP-382                    | 3.2481                                   |
|                                    | ASP-460                    | 3.7834                                   |
|                                    | ILE-462                    | -8.8505                                  |
| TRP-463                            | -4.5206                    |                                          |
| <b>WARS-EGCG (PDBID 1r6t)</b>      | ASP-312                    | 9.9932                                   |
|                                    | GLN-313                    | -3.1124                                  |
|                                    | TYR-316                    | -3.0705                                  |
| <b>PDE5A-Quercetin</b>             | TYR-664                    | -4.3045                                  |

|                     |         |          |
|---------------------|---------|----------|
| <b>(PDBID 2h44)</b> | ILE-665 | -3.5423  |
|                     | LEU-725 | -3.2632  |
|                     | ASP-764 | -18.2668 |
|                     | LEU-765 | -5.6325  |
|                     | LEU-804 | -5.6604  |
|                     | GLN-817 | -11.1203 |
|                     | PHE-820 | -12.5587 |



**Table S5.** The KEGG pathway enrichment analysis for acetoside.

| KEGG_PATHWAY                         | Count | %     | pValue   | Genes                                                                                                                                                                                                                                                                                                                                             |
|--------------------------------------|-------|-------|----------|---------------------------------------------------------------------------------------------------------------------------------------------------------------------------------------------------------------------------------------------------------------------------------------------------------------------------------------------------|
| hsa01100:Metabolic pathways          | 53    | 30.29 | 4.07E-07 | GNPDA1, IMPA1, PNMT, HMGCR, DTYMK, HEXB, MAN1B1, LSS, PNP, ITPKA, GSTZ1, SPR, NOS2, HADH, AMY2A, IMPDH2, NMNAT3, ACADM, BST1, NME2, RFK, ADK, HSD11B1, OAT, NMNAT1, ALDOA, BCAT2, AHCY, SORD, HSD17B1, DCK, PAH, PPCDC, HPRT1, ACAT1, IVD, ATIC, ARG2, UCK2, PAPSS1, AMD1, HPGDS, UAP1, FDPS, PCK1, GPI, DHFR, GCK, PYGL, AKR1B1, LTA4H, ABO, DUT |
| hsa05200:Pathways in cancer          | 20    | 11.43 | 0.000798 | EGFR, AR, HRAS, HSP90AA1, MMP9, MET, BIRC7, MAPK10, KIT, CDK2, DAPK1, TGFB2, AKT1, CASP3, RAC2, GSK3B, RAC1, PDGFRB, NOS2, PIK3R1                                                                                                                                                                                                                 |
| hsa04151:PI3K-Akt signaling pathway  | 18    | 10.29 | 0.001237 | EGFR, HRAS, HSP90AA1, MET, KIT, CDK2, EPHA2, KDR, PCK1, AKT1, PDPK1, EIF4E, GSK3B, RAC1, PDGFRB, INSR, PIK3R1, IL2                                                                                                                                                                                                                                |
| hsa01130:Biosynthesis of antibiotics | 17    | 9.71  | 1.26E-05 | ALDOA, UAP1, ACADM, BCAT2, HMGCR, FDPS, LSS, ACAT1, PCK1, GPI, NME2, GCK, ATIC, ARG2, PAPSS1, HADH, OAT                                                                                                                                                                                                                                           |
| hsa05205:Proteoglycans in cancer     | 16    | 9.14  | 2.58E-05 | EGFR, HRAS, MMP9, MET, ESR1, PPP1CC, SRC, KDR, TGFB2, AKT1, PDPK1, CASP3, MAPK12, MAPK14, RAC1, PIK3R1                                                                                                                                                                                                                                            |
| hsa04015:Rap1 signaling pathway      | 15    | 8.57  | 0.000173 | EGFR, HRAS, MET, KIT, EPHA2, SRC, KDR, AKT1, RAC2, MAPK12, MAPK14, RAC1, PDGFRB, INSR, PIK3R1                                                                                                                                                                                                                                                     |

|                                           |    |          |          |                                                                                                |
|-------------------------------------------|----|----------|----------|------------------------------------------------------------------------------------------------|
| <b>hsa04014:Ras signaling pathway</b>     | 15 | 8.5<br>7 | 0.00037  | EGFR, HRAS, MET, KIT, MAPK10, EPHA2, KDR, AKT1, RAC2, RAC1, RAB5A, PDGFRB, INSR, RASA1, PIK3R1 |
| <b>hsa04510:Focal adhesion</b>            | 14 | 8        | 0.000505 | EGFR, AKT1, PDPK1, HRAS, RAC2, GSK3B, RAC1, MET, PDGFRB, MAPK10, PPP1CC, PIK3R1, SRC, KDR      |
| <b>hsa04910:Insulin signaling pathway</b> | 13 | 7.4<br>3 | 4.09E-05 | HRAS, MAPK10, PPP1CC, PCK1, AKT1, PDPK1, EIF4E, GCK, PYGL, GSK3B, PTPN1, INSR, PIK3R1          |
| <b>hsa00230:Purine metabolism</b>         | 13 | 7.4<br>3 | 0.000416 | FHIT, NME2, GMPR2, ATIC, ADK, PDE4B, DCK, PDE4D, GMPR, PAPSS1, HPRT1, PNP, IMPDH2              |
| <b>hsa05152:Tuberculosis</b>              | 13 | 7.4<br>3 | 0.000438 | AKT1, VDR, CASP3, MAPK12, MAPK14, RAB5A, EEA1, APAF1, MAPK10, CTSS, NOS2, SRC, TGFB2           |
| <b>hsa04010:MAPK signaling pathway</b>    | 13 | 7.4<br>3 | 0.009255 | AKT1, EGFR, CASP3, HRAS, RAC2, MAPK12, MAPK14, RAC1, PDGFRB, HSPA1A, MAPK10, RASA1, TGFB2      |
| <b>hsa04068:FoxO signaling pathway</b>    | 12 | 6.8<br>6 | 0.000145 | AKT1, EGFR, PDPK1, HRAS, MAPK12, MAPK14, MAPK10, INSR, PIK3R1, CDK2, TGFB2, PCK1               |
| <b>hsa05145:Toxoplasmosis</b>             | 11 | 6.2<br>9 | 0.000226 | AKT1, PDPK1, CASP3, MAPK12, MAPK14, BIRC7, HSPA1A, MAPK10, NOS2, PIK3R1, TGFB2                 |
| <b>hsa05161:Hepatitis B</b>               | 11 | 6.2<br>9 | 0.001159 | AKT1, CASP3, HRAS, MMP9, APAF1, MAPK10, CCNA2, PIK3R1, SRC, CDK2, TGFB2                        |

|                                            |    |     |          |                                                                            |
|--------------------------------------------|----|-----|----------|----------------------------------------------------------------------------|
| hsa05203:Viral carcinogenesis              | 11 | 6.2 | 0.01348  | CASP3, HRAS, KAT2B, RAC1, CHEK1, HIST1H4I, CCNA2, HDAC8, PIK3R1, SRC, CDK2 |
| hsa05166:HTLV-I infection                  | 11 | 6.2 | 0.05135  | AKT1, HRAS, KAT2B, GSK3B, LCK, FDPS, PDGFRB, CHEK1, PIK3R1, TGFB2, IL2     |
| hsa04664:Fc epsilon RI signaling pathway   | 10 | 5.7 | 1.39E-05 | AKT1, PDPK1, HRAS, RAC2, MAPK12, MAPK14, RAC1, MAPK10, PIK3R1, BTK         |
| hsa04917:Prolactin signaling pathway       | 10 | 5.7 | 1.99E-05 | AKT1, HRAS, MAPK12, GSK, MAPK14, GSK3B, ESR1, MAPK10, PIK3R1, SRC          |
| hsa05215:Prostate cancer                   | 10 | 5.7 | 0.000112 | AKT1, EGFR, AR, PDPK1, HRAS, HSP90AA1, GSK3B, PDGFRB, PIK3R1, CDK2         |
| hsa04931:Insulin resistance                | 10 | 5.7 | 0.000528 | AKT1, PDPK1, PYGL, GSK3B, PTPN1, MAPK10, PPP1CC, INSR, PIK3R1, PCK1        |
| hsa04919:Thyroid hormone signaling pathway | 10 | 5.7 | 0.000784 | AKT1, PDPK1, HRAS, KAT2B, THRA, THRB, GSK3B, ESR1, PIK3R1, SRC             |
| hsa04722:Neurotrophin signaling pathway    | 10 | 5.7 | 0.001133 | AKT1, PDPK1, HRAS, MAPK12, MAPK14, GSK3B, RAC1, MAPK10, PIK3R1, ARHGDI1    |
| hsa04380:Osteoclast differentiation        | 10 | 5.7 | 0.002094 | AKT1, CTSK, MAPK12, MAPK14, LCK, RAC1, MAPK10, PIK3R1, TGFB2, BTK          |
| hsa04144:Endocytosis                       | 10 | 5.7 | 0.107949 | EGFR, HRAS, MET, RAB5A, EEA1, HSPA1A, KIT, SRC, KDR, TGFB2                 |
| hsa04370:VEGF signaling pathway            | 9  | 5.1 | 4.55E-05 | AKT1, HRAS, RAC2, MAPK12, MAPK14, RAC1, PIK3R1, SRC, KDR                   |

|                                                       |   |     |          |                                                                      |
|-------------------------------------------------------|---|-----|----------|----------------------------------------------------------------------|
| hsa00980:Metabolism of xenobiotics by cytochrome P450 | 9 | 5.1 | 0.000183 | GSTM1, GSTA1, GSTM2, AKR1C2, GSTA3, GSTT2B, SULT2A1, HSD11B1, GSTP1  |
| hsa05204:Chemical carcinogenesis                      | 9 | 5.1 | 0.000316 | GSTM1, GSTA1, GSTM2, GSTA3, GSTT2B, SULT2A1, SULT1A1, HSD11B1, GSTP1 |
| hsa04915:Estrogen signaling pathway                   | 9 | 5.1 | 0.00132  | AKT1, EGFR, HRAS, HSP90AA1, MMP9, ESR1, HSPA1A, PIK3R1, SRC          |
| hsa05231:Choline metabolism in cancer                 | 9 | 5.1 | 0.001502 | AKT1, EGFR, PDPK1, HRAS, RAC2, RAC1, PDGFRB, MAPK10, PIK3R1          |
| hsa04660:T cell receptor signaling pathway            | 9 | 5.1 | 0.001704 | AKT1, PDPK1, HRAS, MAPK12, MAPK14, GSK3B, LCK, PIK3R1, IL2           |
| hsa04668:TNF signaling pathway                        | 9 | 5.1 | 0.002047 | AKT1, CASP3, MAPK12, MAPK14, MMP9, MAPK10, MMP3, SELE, PIK3R1        |
| hsa04071:Sphingolipid signaling pathway               | 9 | 5.1 | 0.004423 | AKT1, PDPK1, HRAS, RAC2, MAPK12, MAPK14, RAC1, MAPK10, PIK3R1        |
| hsa04611:Platelet activation                          | 9 | 5.1 | 0.007133 | AKT1, FGG, MAPK12, MAPK14, GP1BA, PPP1CC, PIK3R1, SRC, BTK           |
| hsa05160:Hepatitis C                                  | 9 | 5.1 | 0.00815  | AKT1, EGFR, PDPK1, HRAS, MAPK12, MAPK14, GSK3B, MAPK10, PIK3R1       |
| hsa05164:Influenza A                                  | 9 | 5.1 | 0.035221 | AKT1, MAPK12, MAPK14, GSK3B, DDX39B, FDPS, HSPA1A, MAPK10, PIK3R1    |
| hsa05169:Epstein-Barr virus infection                 | 9 | 5.1 | 0.054269 | AKT1, MAPK12, MAPK14, GSK3B, HSPA1A, MAPK10, CCNA2, PIK3R1, CDK2     |

|                                                                     |   |     |          |                                                             |
|---------------------------------------------------------------------|---|-----|----------|-------------------------------------------------------------|
| hsa04810:Regulation of actin cytoskeleton                           | 9 | 5.1 | 0.087829 | EGFR, HRAS, RAC2, F2, RAC1, PDGFRB, PPP1CC, PIK3R1, SRC     |
| hsa05210:Colorectal cancer                                          | 8 | 4.5 | 0.000357 | AKT1, CASP3, RAC2, GSK3B, RAC1, MAPK10, PIK3R1, TGFB2       |
| hsa05230:Central carbon metabolism in cancer                        | 8 | 4.5 | 0.000435 | AKT1, EGFR, HRAS, GSK3B, MET, PDGFRB, KIT, PIK3R1           |
| hsa05120:Epithelial cell signaling in Helicobacter pylori infection | 8 | 4.5 | 0.000577 | EGFR, CASP3, MAPK12, MAPK14, RAC1, MET, MAPK10, SRC         |
| hsa04914:Progesterone-mediated oocyte maturation                    | 8 | 4.5 | 0.002704 | AKT1, HSP90AA1, MAPK12, MAPK14, MAPK10, CCNA2, PIK3R1, CDK2 |
| hsa05142:Chagas disease (American trypanosomiasis)                  | 8 | 4.5 | 0.007246 | AKT1, MAPK12, MAPK14, MAPK10, NOS2, PIK3R1, TGFB2, IL2      |
| hsa04152:AMPK signaling pathway                                     | 8 | 4.5 | 0.016572 | AKT1, PDPK1, HMGCR, PFKFB1, CCNA2, INSR, PIK3R1, PCK1       |
| hsa04024:cAMP signaling pathway                                     | 8 | 4.5 | 0.138751 | AKT1, RAC2, PDE4B, RAC1, PDE4D, MAPK10, PPP1CC, PIK3R1      |
| hsa05206:MicroRNAs in cancer                                        | 8 | 4.5 | 0.424525 | EGFR, CASP3, HRAS, MMP9, MET, PIM1, PDGFRB, TGFB2           |
| hsa00480:Glutathione metabolism                                     | 7 | 4   | 0.000762 | GSTM1, GSTA1, GSTM2, GSR, GSTA3, GSTT2B, GSTP1              |
| hsa05212:Pancreatic cancer                                          | 7 | 4   | 0.002724 | AKT1, EGFR, RAC2, RAC1, MAPK10, PIK3R1, TGFB2               |

|                                                    |   |   |          |                                                  |
|----------------------------------------------------|---|---|----------|--------------------------------------------------|
| hsa04662:B cell receptor signaling pathway         | 7 | 4 | 0.003683 | AKT1, HRAS, RAC2, GSK3B, RAC1, PIK3R1, BTK       |
| hsa04610:Complement and coagulation cascades       | 7 | 4 | 0.003683 | F11, FGG, F10, F3, F2, SERPINA1, F7              |
| hsa04520:Adherens junction                         | 7 | 4 | 0.004247 | EGFR, RAC2, RAC1, MET, PTPN1, INSR, SRC          |
| hsa05222:Small cell lung cancer                    | 7 | 4 | 0.010133 | AKT1, FHIT, BIRC7, APAF1, NOS2, PIK3R1, CDK2     |
| hsa04012:ErbB signaling pathway                    | 7 | 4 | 0.011295 | AKT1, EGFR, HRAS, GSK3B, MAPK10, PIK3R1, SRC     |
| hsa04620:Toll-like receptor signaling pathway      | 7 | 4 | 0.027362 | AKT1, CTSK, MAPK12, MAPK14, RAC1, MAPK10, PIK3R1 |
| hsa04360:Axon guidance                             | 7 | 4 | 0.057603 | HRAS, RAC2, GSK3B, RAC1, MET, RASA1, EPHA2       |
| hsa05162:Measles                                   | 7 | 4 | 0.068899 | AKT1, RAB9A, GSK3B, HSPA1A, PIK3R1, CDK2, IL2    |
| hsa04932:Non-alcoholic fatty liver disease (NAFLD) | 7 | 4 | 0.109928 | AKT1, CASP3, GSK3B, RAC1, MAPK10, INSR, PIK3R1   |
| hsa04062:Chemokine signaling pathway               | 7 | 4 | 0.216943 | AKT1, HRAS, RAC2, GSK3B, RAC1, PIK3R1, SRC       |
| hsa04060:Cytokine-cytokine receptor interaction    | 7 | 4 | 0.382645 | EGFR, MET, PDGFRB, KIT, KDR, TGFB2, IL2          |

|                                                           |   |     |          |                                             |
|-----------------------------------------------------------|---|-----|----------|---------------------------------------------|
| hsa00520:Amino sugar and nucleotide sugar metabolism      | 6 | 3.4 | 0.003641 | GPI, UAP1, GNPDA1, GCK, HEXB, CHIT1         |
|                                                           |   | 3   |          |                                             |
| hsa05014:Amyotrophic lateral sclerosis (ALS)              | 6 | 3.4 | 0.004352 | CASP3, MAPK12, MAPK14, RAC1, RAB5A, APAF1   |
|                                                           |   | 3   |          |                                             |
| hsa05213:Endometrial cancer                               | 6 | 3.4 | 0.005157 | AKT1, EGFR, PDPK1, HRAS, GSK3B, PIK3R1      |
|                                                           |   | 3   |          |                                             |
| hsa05223:Non-small cell lung cancer                       | 6 | 3.4 | 0.007073 | AKT1, EGFR, FHIT, PDPK1, HRAS, PIK3R1       |
|                                                           |   | 3   |          |                                             |
| hsa05211:Renal cell carcinoma                             | 6 | 3.4 | 0.013099 | AKT1, HRAS, RAC1, MET, PIK3R1, TGFB2        |
|                                                           |   | 3   |          |                                             |
| hsa00982:Drug metabolism - cytochrome P450                | 6 | 3.4 | 0.015702 | GSTM1, GSTA1, GSTM2, GSTA3, GSTT2B, GSTP1   |
|                                                           |   | 3   |          |                                             |
| hsa05218:Melanoma                                         | 6 | 3.4 | 0.018629 | AKT1, EGFR, HRAS, MET, PDGFRB, PIK3R1       |
|                                                           |   | 3   |          |                                             |
| hsa04912:GnRH signaling pathway                           | 6 | 3.4 | 0.047342 | EGFR, HRAS, MAPK12, MAPK14, MAPK10, SRC     |
|                                                           |   | 3   |          |                                             |
| hsa04750:Inflammatory mediator regulation of TRP channels | 6 | 3.4 | 0.061428 | MAPK12, MAPK14, MAPK10, PPP1CC, PIK3R1, SRC |
|                                                           |   | 3   |          |                                             |
| hsa04066:HIF-1 signaling pathway                          | 6 | 3.4 | 0.061428 | AKT1, EGFR, EIF4E, NOS2, INSR, PIK3R1       |
|                                                           |   | 3   |          |                                             |
| hsa00240:Pyrimidine metabolism                            | 6 | 3.4 | 0.075202 | NME2, DTYMK, DCK, UCK2, PNP, DUT            |
|                                                           |   | 3   |          |                                             |

|                                                                   |   |     |          |                                             |
|-------------------------------------------------------------------|---|-----|----------|---------------------------------------------|
| hsa05146:Amoebiasis                                               | 6 | 3.4 | 0.080138 | CASP3, ARG2, RAB5A, NOS2, PIK3R1, TGFB2     |
|                                                                   |   | 3   |          |                                             |
| hsa01200:Carbon metabolism                                        | 6 | 3.4 | 0.09874  | ALDOA, GPI, ME2, ACADM, GCK, ACAT1          |
|                                                                   |   | 3   |          |                                             |
| hsa04670:Leukocyte transendothelial migration                     | 6 | 3.4 | 0.113249 | RAC2, MAPK12, MAPK14, MMP9, RAC1, PIK3R1    |
|                                                                   |   | 3   |          |                                             |
| hsa04650:Natural killer cell mediated cytotoxicity                | 6 | 3.4 | 0.125556 | CASP3, HRAS, RAC2, LCK, RAC1, PIK3R1        |
|                                                                   |   | 3   |          |                                             |
| hsa04728:Dopaminergic synapse                                     | 6 | 3.4 | 0.145116 | AKT1, MAPK12, MAPK14, GSK3B, MAPK10, PPP1CC |
|                                                                   |   | 3   |          |                                             |
| hsa04550:Signaling pathways regulating pluripotency of stem cells | 6 | 3.4 | 0.187801 | AKT1, HRAS, MAPK12, MAPK14, GSK3B, PIK3R1   |
|                                                                   |   | 3   |          |                                             |
| hsa05219:Bladder cancer                                           | 5 | 2.8 | 0.011584 | EGFR, HRAS, MMP9, SRC, DAPK1                |
|                                                                   |   | 6   |          |                                             |
| hsa00280:Valine, leucine and isoleucine degradation               | 5 | 2.8 | 0.018467 | BCAT2, ACADM, IVD, HADH, ACAT1              |
|                                                                   |   | 6   |          |                                             |
| hsa05221:Acute myeloid leukemia                                   | 5 | 2.8 | 0.032775 | AKT1, HRAS, PIM1, KIT, PIK3R1               |
|                                                                   |   | 6   |          |                                             |
| hsa05131:Shigellosis                                              | 5 | 2.8 | 0.049725 | MAPK12, MAPK14, RAC1, MAPK10, SRC           |
|                                                                   |   | 6   |          |                                             |
| hsa05214:Glioma                                                   | 5 | 2.8 | 0.052126 | AKT1, EGFR, HRAS, PDGFRB, PIK3R1            |



|                                                   |  |   |     |          |                                      |   |
|---------------------------------------------------|--|---|-----|----------|--------------------------------------|---|
|                                                   |  |   | 6   |          |                                      |   |
| hsa05133: Pertussis                               |  | 5 | 2.8 | 0.079529 | CASP3, MAPK12, MAPK14, MAPK10, NOS2  | 6 |
| hsa05132: Salmonella infection                    |  | 5 | 2.8 | 0.105673 | MAPK12, MAPK14, RAC1, MAPK10, NOS2   | 6 |
| hsa04922: Glucagon signaling pathway              |  | 5 | 2.8 | 0.16768  | AKT1, GCK, PYGL, PFKFB1, PCK1        | 6 |
| hsa04110: Cell cycle                              |  | 5 | 2.8 | 0.282657 | GSK3B, CHEK1, CCNA2, CDK2, TGFB2     | 6 |
| hsa04261: Adrenergic signaling in cardiomyocytes  |  | 5 | 2.8 | 0.391402 | AKT1, MAPK12, MAPK14, PPP1CC, PIK3R1 | 6 |
| hsa04145: Phagosome                               |  | 5 | 2.8 | 0.425874 | RAC1, TAP1, RAB5A, EEA1, CTSS        | 6 |
| hsa04921: Oxytocin signaling pathway              |  | 5 | 2.8 | 0.450211 | EGFR, HRAS, PPP1CC, PIK3R1, SRC      | 6 |
| hsa05202: Transcriptional misregulation in cancer |  | 5 | 2.8 | 0.497843 | DOT1L, MMP9, ELANE, MET, MMP3        | 6 |
| hsa05168: Herpes simplex infection                |  | 5 | 2.8 | 0.565781 | CASP3, TAP1, MAPK10, PPP1CC, CDK2    | 6 |
| hsa00760: Nicotinate and nicotinamide metabolism  |  | 4 | 2.2 | 0.024247 | NMNAT3, BST1, PNP, NMNAT1            | 9 |
| hsa00051: Fructose and mannose metabolism         |  | 4 | 2.2 | 0.031405 | ALDOA, SORD, PFKFB1, AKR1B1          | 9 |

|                                              |   |     |          |                                   |
|----------------------------------------------|---|-----|----------|-----------------------------------|
| hsa00500:Starch and sucrose metabolism       | 4 | 2.2 | 0.03401  | GPI, GCK, PYGL, AMY2A             |
| hsa00620:Pyruvate metabolism                 | 4 | 2.2 | 0.055242 | ME2, GLO1, ACAT1, PCK1            |
| hsa04930:Type II diabetes mellitus           | 4 | 2.2 | 0.085498 | GCK, MAPK10, INSR, PIK3R1         |
| hsa00330:Arginine and proline metabolism     | 4 | 2.2 | 0.093967 | ARG2, NOS2, AMD1, OAT             |
| hsa00310:Lysine degradation                  | 4 | 2.2 | 0.102767 | DOT1L, HADH, ACAT1, KMT5A         |
| hsa04621:NOD-like receptor signaling pathway | 4 | 2.2 | 0.11655  | HSP90AA1, MAPK12, MAPK14, MAPK10  |
| hsa00140:Steroid hormone biosynthesis        | 4 | 2.2 | 0.130985 | AKR1C2, HSD17B1, HSD11B1, SULT2B1 |
| hsa04150:mTOR signaling pathway              | 4 | 2.2 | 0.130985 | AKT1, PDPK1, EIF4E, PIK3R1        |
| hsa04210:Apoptosis                           | 4 | 2.2 | 0.151142 | AKT1, CASP3, APAF1, PIK3R1        |
| hsa04115:p53 signaling pathway               | 4 | 2.2 | 0.17761  | CASP3, CHEK1, APAF1, CDK2         |
| hsa00010:Glycolysis / Gluconeogenesis        | 4 | 2.2 | 0.17761  | ALDOA, GPI, GCK, PCK1             |
| hsa05140:Leishmaniasis                       | 4 | 2.2 | 0.199636 | MAPK12, MAPK14, NOS2, TGFB2       |
| hsa05220:Chronic myeloid                     | 4 | 2.2 | 0.205243 | AKT1, HRAS, PIK3R1, TGFB2         |

|                                                      |   |     |          |                                  |   |
|------------------------------------------------------|---|-----|----------|----------------------------------|---|
| leukemia                                             |   | 9   |          |                                  |   |
| hsa01230:Biosynthesis of amino acids                 | 4 | 2.2 | 0.216564 | ALDOA, BCAT2, ARG2, PAH          | 9 |
| hsa04612:Antigen processing and presentation         | 4 | 2.2 | 0.228014 | HSP90AA1, TAP1, HSPA1A, CTSS     | 9 |
| hsa05100:Bacterial invasion of epithelial cells      | 4 | 2.2 | 0.239577 | RAC1, MET, PIK3R1, SRC           | 9 |
| hsa04666:Fc gamma R-mediated phagocytosis            | 4 | 2.2 | 0.274797 | AKT1, RAC2, RAC1, PIK3R1         | 9 |
| hsa04540:Gap junction                                | 4 | 2.2 | 0.298576 | EGFR, HRAS, PDGFRB, SRC          | 9 |
| hsa04114:Oocyte meiosis                              | 4 | 2.2 | 0.423197 | AR, AURKA, PPP1CC, CDK2          | 9 |
| hsa04310:Wnt signaling pathway                       | 4 | 2.2 | 0.580519 | RAC2, GSK3B, RAC1, MAPK10        | 9 |
| hsa04630:Jak-STAT signaling pathway                  | 4 | 2.2 | 0.614305 | AKT1, PIM1, PIK3R1, IL2          | 9 |
| hsa04022:cGMP-PKG signaling pathway                  | 4 | 2.2 | 0.704402 | AKT1, PPP1CC, INSR, PIK3R1       | 9 |
| hsa05010:Alzheimer's disease                         | 4 | 2.2 | 0.712092 | CASP3, GSK3B, BACE1, APAF1       | 9 |
| hsa04141:Protein processing in endoplasmic reticulum | 4 | 2.2 | 0.71588  | HSP90AA1, MAN1B1, HSPA1A, MAPK10 | 9 |

|                                                    |          |   |     |          |                               |
|----------------------------------------------------|----------|---|-----|----------|-------------------------------|
| hsa05034:Alcoholism                                |          | 4 | 2.2 | 0.744814 | HRAS, HIST1H4I, PPP1CC, HDAC8 |
|                                                    |          |   | 9   |          |                               |
| hsa04020:Calcium signaling pathway                 |          | 4 | 2.2 | 0.751674 | EGFR, PDGFRB, NOS2, ITPKA     |
|                                                    |          |   | 9   |          |                               |
| hsa00900:Terpenoid biosynthesis                    | backbone | 3 | 1.7 | 0.081493 | HMGCR, FDPS, ACAT1            |
|                                                    |          |   | 1   |          |                               |
| hsa05340:Primary immunodeficiency                  |          | 3 | 1.7 | 0.167849 | LCK, TAP1, BTK                |
|                                                    |          |   | 1   |          |                               |
| hsa04960:Aldosterone-regulated sodium reabsorption |          | 3 | 1.7 | 0.207232 | PDPK1, INSR, PIK3R1           |
|                                                    |          |   | 1   |          |                               |
| hsa04973:Carbohydrate digestion and absorption     |          | 3 | 1.7 | 0.231311 | AKT1, AMY2A, PIK3R1           |
|                                                    |          |   | 1   |          |                               |
| hsa00071:Fatty acid degradation                    |          | 3 | 1.7 | 0.247465 | ACADM, HADH, ACAT1            |
|                                                    |          |   | 1   |          |                               |
| hsa00983:Drug metabolism - other enzymes           |          | 3 | 1.7 | 0.263658 | UCK2, HPRT1, IMPDH2           |
|                                                    |          |   | 1   |          |                               |
| hsa01212:Fatty acid metabolism                     |          | 3 | 1.7 | 0.279857 | ACADM, HADH, ACAT1            |
|                                                    |          |   | 1   |          |                               |
| hsa05144:Malaria                                   |          | 3 | 1.7 | 0.287949 | MET, SELE, TGFB2              |
|                                                    |          |   | 1   |          |                               |
| hsa05134:Legionellosis                             |          | 3 | 1.7 | 0.328201 | CASP3, HSPA1A, APAF1          |
|                                                    |          |   | 1   |          |                               |

|                                                |   |     |          |                        |
|------------------------------------------------|---|-----|----------|------------------------|
| hsa04923:Regulation of lipolysis in adipocytes | 3 | 1.7 | 0.344146 | AKT1, INSR, PIK3R1     |
| hsa05416:Viral myocarditis                     | 3 | 1.7 | 0.352075 | CASP3, RAC2, RAC1      |
| hsa03320:PPAR signaling pathway                | 3 | 1.7 | 0.429219 | PDPK1, ACADM, PCK1     |
| hsa04976:Bile secretion                        | 3 | 1.7 | 0.444086 | SULT2A1, HMGCR, CA2    |
| hsa04920:Adipocytokine signaling pathway       | 3 | 1.7 | 0.451439 | AKT1, MAPK10, PCK1     |
| hsa04622:RIG-I-like receptor signaling pathway | 3 | 1.7 | 0.451439 | MAPK12, MAPK14, MAPK10 |
| hsa05323:Rheumatoid arthritis                  | 3 | 1.7 | 0.573618 | CTSK, MMP3, TGFB2      |
| hsa04972:Pancreatic secretion                  | 3 | 1.7 | 0.603891 | BST1, RAC1, CA2        |
| hsa04070:Phosphatidylinositol signaling system | 3 | 1.7 | 0.632525 | IMPA1, ITPKA, PIK3R1   |
| hsa04916:Melanogenesis                         | 3 | 1.7 | 0.643522 | HRAS, GSK3B, KIT       |
| hsa04723:Retrograde endocannabinoid signalling | 3 | 1.7 | 0.648923 | MAPK12, MAPK14, MAPK10 |

|                                                  |   |     |          |                      |
|--------------------------------------------------|---|-----|----------|----------------------|
| hsa04725:Cholinergic synapse                     | 3 | 1.7 | 0.699429 | AKT1, HRAS, PIK3R1   |
|                                                  |   | 1   |          |                      |
| hsa04142:Lysosome                                | 3 | 1.7 | 0.743806 | CTSK, HEXB, CTSS     |
|                                                  |   | 1   |          |                      |
| hsa04530:Tight junction                          | 3 | 1.7 | 0.803179 | AKT1, HRAS, SRC      |
|                                                  |   | 1   |          |                      |
| hsa04390:Hippo signaling pathway                 | 3 | 1.7 | 0.84483  | GSK3B, PPP1CC, TGFB2 |
|                                                  |   | 1   |          |                      |
| hsa04080:Neuroactive ligand-receptor interaction | 3 | 1.7 | 0.985047 | THRA, THRB, F2       |
|                                                  |   | 1   |          |                      |

**Table S6.** The KEGG pathway enrichment analysis for quercetin.

| KEGG_PATHWAY                        | Count | %     | pValue      | Genes                                                                                                                                                                                                                                                                   |
|-------------------------------------|-------|-------|-------------|-------------------------------------------------------------------------------------------------------------------------------------------------------------------------------------------------------------------------------------------------------------------------|
| hsa01100:Metabolic pathways         | 43    | 26.22 | 0.000340773 | BCAT2, IMPA1, SORD, NDST1, PNMT, HSD17B1, DTYMK, HEXB, DCK, ADH5, HK1, PAH, HPRT1, AKR1C3, TYMS, CBR1, NT5M, ATIC, DHODH, SPR, UCK2, IMPDH2, UAP1, BST1, AK1, OTC, APRT, PCK1, GART, GPI, UMPS, DHFR, GCK, RFK, ADK, AKR1B1, BHMT, HSD11B1, MTAP, ABO, NMNAT1, DUT, CBS |
| hsa05200:Pathways in cancer         | 23    | 14.02 | 1.44E-05    | FGFR1, AR, HRAS, HSP90AA1, MAP2K1, MET, BIRC7, CDK6, MAPK10, KIT, MMP1, CDK2, DAPK1, CDC42, CASP3, NCOA4, GSK3B, RHOA, PDGFRB, MAPK8, ABL1, PIK3R1, AKT2                                                                                                                |
| hsa04151:PI3K-Akt signaling pathway | 21    | 12.8  | 2.23E-05    | FGFR1, HRAS, HSP90AA1, MAP2K1, MET, CDK6, KIT, CDK2, EPHA2, KDR, PCK1, PDPK1, GSK3B, TEK, RHEB, PDGFRB, JAK2, INSR, PIK3R1, AKT2, IL2                                                                                                                                   |
| hsa04014:Ras signaling pathway      | 20    | 12.2  | 1.45E-07    | FGFR1, HRAS, MAP2K1, MET, MAPK10, KIT, EPHA2, KDR, CDC42, TEK, RHOA, ZAP70, RAB5A, PDGFRB, MAPK8, ABL1, INSR, RASA1, PIK3R1, AKT2                                                                                                                                       |
| hsa05205:Proteoglycans in cancer    | 17    | 10.37 | 2.91E-06    | FGFR1, HRAS, MAP2K1, MET, ESR1, PPP1CC, SRC, KDR, CDC42, PDPK1, CASP3, MAPK12, MAPK14, RHOA, PIK3R1, PLAU, AKT2                                                                                                                                                         |

|                                            |           |    |       |             |                                                                                                                |
|--------------------------------------------|-----------|----|-------|-------------|----------------------------------------------------------------------------------------------------------------|
| hsa04015:Rap1 pathway                      | signaling | 17 | 10.37 | 5.50E-06    | FGFR1, HRAS, MAP2K1, MET, KIT, EPHA2, SRC, KDR, CDC42, MAPK12, MAPK14, TEK, RHOA, PDGFRB, INSR, PIK3R1, AKT2   |
| hsa04910:Insulin pathway                   | signaling | 15 | 9.15  | 7.50E-07    | HRAS, MAP2K1, HK1, MAPK10, PPP1CC, PCK1, PDPK1, GSK, GSK3B, RHEB, MAPK8, PTPN1, INSR, PIK3R1, AKT2             |
| hsa04510:Focal adhesion                    |           | 15 | 9.15  | 7.79E-05    | HRAS, MAP2K1, MET, MAPK10, PPP1CC, SRC, KDR, CDC42, PDPK1, GSK3B, RHOA, PDGFRB, MAPK8, PIK3R1, AKT2            |
| hsa04010:MAPK pathway                      | signaling | 15 | 9.15  | 0.000712811 | FGFR1, HRAS, MAP2K1, HSPA1A, MAPKAPK2, MAPK10, CDC42, CASP3, MAPK12, MAPK14, PDGFRB, MAPK8, RASA1, HSPA8, AKT2 |
| hsa04917:Prolactin pathway                 | signaling | 14 | 8.54  | 1.41E-09    | HRAS, MAP2K1, ESR1, MAPK10, ESR2, SRC, GSK, MAPK12, MAPK14, GSK3B, MAPK8, JAK2, PIK3R1, AKT2                   |
| hsa04722:Neurotrophin signaling pathway    |           | 14 | 8.54  | 8.96E-07    | CDC42, PDPK1, HRAS, MAPK12, MAP2K1, MAPK14, GSK3B, RHOA, MAPK8, MAPK10, MAPKAPK2, ABL1, PIK3R1, AKT2           |
| hsa00230:Purine metabolism                 |           | 14 | 8.54  | 6.06E-05    | GMPT2, AK1, DCK, PDE4D, HPRT1, GMPR, APRT, GART, NT5M, ATIC, ADK, PDE4B, PDE5A, IMPDH2                         |
| hsa04660:T cell receptor signaling pathway |           | 13 | 7.93  | 1.10E-06    | CDC42, PDPK1, HRAS, MAPK12, MAP2K1, MAPK14, GSK3B, LCK, RHOA, ZAP70, PIK3R1, AKT2, IL2                         |
| hsa05152:Tuberculosis                      |           | 13 | 7.93  | 0.000263824 | VDR, CASP3, MAPK12, MAPK14, RHOA, RAB5A, EEA1, JAK2, MAPK8, MAPK10, APAF1, SRC, AKT2                           |
| hsa05145:Toxoplasmosis                     |           | 12 | 7.32  | 2.73E-05    | PDPK1, CASP3, MAPK12, MAPK14, BIRC7, MAPK8, HSPA1A, JAK2, MAPK10, PIK3R1, HSPA8, AKT2                          |



|                                                       |    |      |             |                                                                                        |
|-------------------------------------------------------|----|------|-------------|----------------------------------------------------------------------------------------|
| hsa04068:FoxO signaling pathway                       | 12 | 7.32 | 8.87E-05    | PDPK1, HRAS, MAPK12, MAP2K1, MAPK14, MAPK8, MAPK10, INSR, PIK3R1, CDK2, AKT2, PCK1     |
| hsa05161:Hepatitis B                                  | 12 | 7.32 | 0.000180104 | CASP3, HRAS, MAP2K1, MAPK8, CDK6, APAF1, MAPK10, CCNA2, PIK3R1, SRC, CDK2, AKT2        |
| hsa05164:Influenza A                                  | 12 | 7.32 | 0.000860567 | MAPK12, MAP2K1, MAPK14, GSK3B, MAPK8, HSPA1A, JAK2, MAPK10, CASP1, PIK3R1, HSPA8, AKT2 |
| hsa05203:Viral carcinogenesis                         | 12 | 7.32 | 0.003194488 | CDC42, CASP3, HRAS, RHOA, CHEK1, CDK6, MAPKAPK2, CCNA2, HDAC8, PIK3R1, SRC, CDK2       |
| hsa01130:Biosynthesis of antibiotics                  | 12 | 7.32 | 0.00412817  | GPI, UAP1, BCAT2, GCK, ATIC, OTC, AK1, ADH5, HK1, GART, CBS, PCK1                      |
| hsa04144:Endocytosis                                  | 12 | 7.32 | 0.016868028 | CDC42, HRAS, MET, RAB5A, RHOA, RAB11A, EEA1, HSPA1A, KIT, SRC, HSPA8, KDR              |
| hsa00980:Metabolism of xenobiotics by cytochrome P450 | 11 | 6.71 | 2.29E-06    | GSTM1, GSTA1, GSTM2, AKR1C2, GSTA3, CBR1, GSTT2B, HSD11B1, ADH5, GSTP1, AKR1C1         |
| hsa05215:Prostate cancer                              | 11 | 6.71 | 1.12E-05    | FGFR1, AR, PDPK1, HRAS, HSP90AA1, MAP2K1, GSK3B, PDGFRB, PIK3R1, CDK2, AKT2            |
| hsa04931:Insulin resistance                           | 11 | 6.71 | 6.80E-05    | PPARA, PDPK1, GSK3B, MAPK8, PTPN1, MAPK10, PPP1CC, INSR, PIK3R1, AKT2, PCK1            |
| hsa04919:Thyroid hormone signaling pathway            | 11 | 6.71 | 0.000107616 | PDPK1, NCOA1, HRAS, NCOA2, MAP2K1, GSK3B, ESR1, RHEB, PIK3R1, SRC, AKT2                |
| hsa05169:Epstein-Barr virus infection                 | 11 | 6.71 | 0.005590177 | MAPK12, MAPK14, GSK3B, MAPK8, HSPA1A, MAPK10, CCNA2, PIK3R1, HSPA8, CDK2, AKT2         |
| hsa04370:VEGF signaling pathway                       | 10 | 6.1  | 3.55E-06    | CDC42, HRAS, MAPK12, MAP2K1, MAPK14, MAPKAPK2, PIK3R1, SRC, KDR, AKT2                  |

|                                                       |           |    |     |          |                                                               |                                                                            |
|-------------------------------------------------------|-----------|----|-----|----------|---------------------------------------------------------------|----------------------------------------------------------------------------|
| hsa05230:Central<br>metabolism in cancer              | carbon    | 10 | 6.1 | 5.34E-06 | FGFR1, HRAS, GCK, MAP2K1, MET, PDGFRB, HK1, KIT, PIK3R1, AKT2 |                                                                            |
| hsa04664:Fc<br>signaling pathway                      | epsilon   | RI | 10  | 6.1      | 8.92E-06                                                      | PDPK1, HRAS, MAPK12, MAP2K1, MAPK14, MAPK8, MAPK10, PIK3R1, AKT2, BTK      |
| hsa05204:Chemical<br>carcinogenesis                   |           |    | 10  | 6.1      | 3.40E-05                                                      | GSTM1, GSTA1, GSTM2, GSTA3, CBR1, GSTT2B, SULT1A1, HSD11B1, ADH5, GSTP1    |
| hsa04914:Progesterone-medi-<br>ated oocyte maturation |           |    | 10  | 6.1      | 6.67E-05                                                      | HSP90AA1, MAPK12, MAP2K1, MAPK14, MAPK8, MAPK10, CCNA2, PIK3R1, CDK2, AKT2 |
| hsa04915:Estrogen<br>pathway                          | signaling |    | 10  | 6.1      | 0.000182626                                                   | HRAS, HSP90AA1, MAP2K1, ESR1, HSPA1A, ESR2, PIK3R1, SRC, HSPA8, AKT2       |
| hsa04668:TNF<br>pathway                               | signaling |    | 10  | 6.1      | 0.000306781                                                   | CASP3, MAPK12, MAP2K1, MAPK14, MAPK8, MAPK10, MMP3, SELE, PIK3R1, AKT2     |
| hsa04071:Sphingolipid<br>signaling pathway            |           |    | 10  | 6.1      | 0.00076618                                                    | PDPK1, HRAS, MAPK12, MAP2K1, MAPK14, RHOA, MAPK8, MAPK10, PIK3R1, AKT2     |
| hsa04380:Osteoclast<br>differentiation                |           |    | 10  | 6.1      | 0.00143165                                                    | CTSK, MAPK12, MAP2K1, MAPK14, LCK, MAPK8, MAPK10, PIK3R1, AKT2, BTK        |
| hsa05162:Measles                                      |           |    | 10  | 6.1      | 0.001591842                                                   | RAB9A, GSK3B, CDK6, HSPA1A, JAK2, PIK3R1, HSPA8, CDK2, AKT2, IL2           |
| hsa05160:Hepatitis C                                  |           |    | 10  | 6.1      | 0.001591842                                                   | PPARA, PDPK1, HRAS, MAPK12, MAPK14, GSK3B, MAPK8, MAPK10, PIK3R1, AKT2     |
| hsa04062:Chemokine<br>pathway                         | signaling |    | 10  | 6.1      | 0.014153225                                                   | CDC42, HRAS, MAP2K1, HCK, GSK3B, RHOA, JAK2, PIK3R1, SRC, AKT2             |
| hsa04024:cAMP<br>pathway                              | signaling |    | 10  | 6.1      | 0.020471649                                                   | PPARA, MAP2K1, PDE4B, RHOA, MAPK8, PDE4D, MAPK10, PPP1CC, PIK3R1, AKT2     |
| hsa04810:Regulation of actin<br>cytoskeleton          |           |    | 10  | 6.1      | 0.029389537                                                   | CDC42, FGFR1, HRAS, MAP2K1, F2, RHOA, PDGFRB, PPP1CC, PIK3R1, SRC          |

|                                                                     |    |      |             |                                                                |
|---------------------------------------------------------------------|----|------|-------------|----------------------------------------------------------------|
| hsa05206:MicroRNAs in cancer                                        | 10 | 6.1  | 0.131633155 | CASP3, HRAS, MAP2K1, MET, PIM1, RHOA, PDGFRB, CDK6, ABL1, PLAU |
| hsa04012:ErbB signaling pathway                                     | 9  | 5.49 | 0.000388185 | HRAS, MAP2K1, GSK3B, MAPK8, MAPK10, ABL1, PIK3R1, SRC, AKT2    |
| hsa05231:Choline metabolism in cancer                               | 9  | 5.49 | 0.001054924 | PDPK1, HRAS, MAP2K1, PDGFRB, RHEB, MAPK8, MAPK10, PIK3R1, AKT2 |
| hsa04611:Platelet activation                                        | 9  | 5.49 | 0.005155012 | FGG, MAPK12, MAPK14, RHOA, PPP1CC, PIK3R1, SRC, AKT2, BTK      |
| hsa04550:Signaling pathways regulating pluripotency of stem cells   | 9  | 5.49 | 0.007987844 | FGFR1, HRAS, MAPK12, MAP2K1, MAPK14, GSK3B, JAK2, PIK3R1, AKT2 |
| hsa04932:Non-alcoholic fatty liver disease (NAFLD)                  | 9  | 5.49 | 0.012311847 | CDC42, PPARA, CASP3, GSK3B, MAPK8, MAPK10, INSR, PIK3R1, AKT2  |
| hsa05210:Colorectal cancer                                          | 8  | 4.88 | 0.000255348 | CASP3, MAP2K1, GSK3B, RHOA, MAPK8, MAPK10, PIK3R1, AKT2        |
| hsa05120:Epithelial cell signaling in Helicobacter pylori infection | 8  | 4.88 | 0.000414565 | CDC42, CASP3, MAPK12, MAPK14, MET, MAPK8, MAPK10, SRC          |
| hsa05218:Melanoma                                                   | 8  | 4.88 | 0.000592128 | FGFR1, HRAS, MAP2K1, MET, PDGFRB, CDK6, PIK3R1, AKT2           |
| hsa04912:GnRH signaling pathway                                     | 8  | 4.88 | 0.002564025 | CDC42, HRAS, MAPK12, MAP2K1, MAPK14, MAPK8, MAPK10, SRC        |
| hsa00240:Pyrimidine metabolism                                      | 8  | 4.88 | 0.005398534 | TYMS, UMPS, NT5M, DTYMK, DHODH, DCK, UCK2, DUT                 |
| hsa04620:Toll-like receptor signaling pathway                       | 8  | 4.88 | 0.005987073 | CTSK, MAPK12, MAP2K1, MAPK14, MAPK8, MAPK10, PIK3R1, AKT2      |

|                                                           |           |   |      |             |                                                      |
|-----------------------------------------------------------|-----------|---|------|-------------|------------------------------------------------------|
| hsa04152:AMPK pathway                                     | signaling | 8 | 4.88 | 0.012562023 | PDPK1, PFKFB1, RHEB, CCNA2, INSR, PIK3R1, AKT2, PCK1 |
| hsa04360:Axon guidance                                    |           | 8 | 4.88 | 0.015405725 | CDC42, HRAS, GSK3B, MET, RHOA, ABL1, RASA1, EPHA2    |
| hsa05166:HTLV-I infection                                 |           | 8 | 4.88 | 0.273422172 | HRAS, GSK3B, LCK, PDGFRB, CHEK1, PIK3R1, AKT2, IL2   |
| hsa00480:Glutathione metabolism                           |           | 7 | 4.27 | 0.000570012 | GSTM1, GSTA1, GSTM2, GSR, GSTA3, GSTT2B, GSTP1       |
| hsa05131:Shigellosis                                      |           | 7 | 4.27 | 0.001907553 | CDC42, MAPK12, MAPK14, MAPK8, MAPK10, ABL1, SRC      |
| hsa05212:Pancreatic cancer                                |           | 7 | 4.27 | 0.002066618 | CDC42, MAP2K1, MAPK8, CDK6, MAPK10, PIK3R1, AKT2     |
| hsa00982:Drug metabolism cytochrome P450                  | -         | 7 | 4.27 | 0.002604333 | GSTM1, GSTA1, GSTM2, GSTA3, GSTT2B, ADH5, GSTP1      |
| hsa04520:Adherens junction                                |           | 7 | 4.27 | 0.003240941 | CDC42, FGFR1, MET, RHOA, PTPN1, INSR, SRC            |
| hsa05133:Pertussis                                        |           | 7 | 4.27 | 0.004262009 | CASP3, MAPK12, MAPK14, RHOA, MAPK8, MAPK10, CASP1    |
| hsa04750:Inflammatory mediator regulation of TRP channels |           | 7 | 4.27 | 0.015198484 | MAPK12, MAPK14, MAPK8, MAPK10, PPP1CC, PIK3R1, SRC   |
| hsa05142:Chagas disease (American trypanosomiasis)        | disease   | 7 | 4.27 | 0.019839336 | MAPK12, MAPK14, MAPK8, MAPK10, PIK3R1, AKT2, IL2     |
| hsa04728:Dopaminergic synapse                             |           | 7 | 4.27 | 0.047796866 | MAPK12, MAPK14, GSK3B, MAPK8, MAPK10, PPP1CC, AKT2   |
| hsa04022:cGMP-PKG pathway                                 | signaling | 7 | 4.27 | 0.126287487 | MAP2K1, PDE5A, RHOA, PPP1CC, INSR, PIK3R1, AKT2      |

|                                              |   |      |             |                                                   |
|----------------------------------------------|---|------|-------------|---------------------------------------------------|
| hsa05168:Herpes simplex infection            | 7 | 4.27 | 0.17428061  | CASP3, TAP1, MAPK8, JAK2, MAPK10, PPP1CC, CDK2    |
| hsa04930:Type II diabetes mellitus           | 6 | 3.66 | 0.002874284 | GCK, HK1, MAPK8, MAPK10, INSR, PIK3R1             |
| hsa05014:Amyotrophic lateral sclerosis (ALS) | 6 | 3.66 | 0.003441934 | CASP3, MAPK12, MAPK14, RAB5A, APAF1, CASP1        |
| hsa05213:Endometrial cancer                  | 6 | 3.66 | 0.004086067 | PDPK1, HRAS, MAP2K1, GSK3B, PIK3R1, AKT2          |
| hsa04621:NOD-like receptor signaling pathway | 6 | 3.66 | 0.005207541 | HSP90AA1, MAPK12, MAPK14, MAPK8, MAPK10, CASP1    |
| hsa05221:Acute myeloid leukemia              | 6 | 3.66 | 0.005625459 | HRAS, MAP2K1, PIM1, KIT, PIK3R1, AKT2             |
| hsa05223:Non-small cell lung cancer          | 6 | 3.66 | 0.005625459 | PDPK1, HRAS, MAP2K1, CDK6, PIK3R1, AKT2           |
| hsa00140:Steroid hormone biosynthesis        | 6 | 3.66 | 0.006531403 | AKR1C3, AKR1C2, HSD17B1, HSD11B1, SULT2B1, AKR1C1 |
| hsa05211:Renal cell carcinoma                | 6 | 3.66 | 0.010505314 | CDC42, HRAS, MAP2K1, MET, PIK3R1, AKT2            |
| hsa05214:Glioma                              | 6 | 3.66 | 0.010505314 | HRAS, MAP2K1, PDGFRB, CDK6, PIK3R1, AKT2          |
| hsa04662:B cell receptor signaling pathway   | 6 | 3.66 | 0.013394653 | HRAS, MAP2K1, GSK3B, PIK3R1, AKT2, BTK            |
| hsa04920:Adipocytokine signaling pathway     | 6 | 3.66 | 0.014192927 | PPARA, MAPK8, JAK2, MAPK10, AKT2, PCK1            |
| hsa05220:Chronic myeloid leukemia            | 6 | 3.66 | 0.015884239 | HRAS, MAP2K1, CDK6, ABL1, PIK3R1, AKT2            |
| hsa05132:Salmonella infection                | 6 | 3.66 | 0.027596158 | CDC42, MAPK12, MAPK14, MAPK8, MAPK10, CASP1       |

|                                                      |   |      |             |                                              |
|------------------------------------------------------|---|------|-------------|----------------------------------------------|
| hsa05222:Small cell lung cancer                      | 6 | 3.66 | 0.030188985 | BIRC7, CDK6, APAF1, PIK3R1, CDK2, AKT2       |
| hsa04066:HIF-1 signaling pathway                     | 6 | 3.66 | 0.050745315 | MAP2K1, TEK, HK1, INSR, PIK3R1, AKT2         |
| hsa04650:Natural killer cell mediated cytotoxicity   | 6 | 3.66 | 0.105874492 | CASP3, HRAS, MAP2K1, LCK, ZAP70, PIK3R1      |
| hsa04110:Cell cycle                                  | 6 | 3.66 | 0.111437834 | GSK3B, CHEK1, CDK6, ABL1, CCNA2, CDK2        |
| hsa04921:Oxytocin signaling pathway                  | 6 | 3.66 | 0.224723755 | HRAS, MAP2K1, RHOA, PPP1CC, PIK3R1, SRC      |
| hsa04141:Protein processing in endoplasmic reticulum | 6 | 3.66 | 0.26710988  | HSP90AA1, BAG1, MAPK8, HSPA1A, MAPK10, HSPA8 |
| hsa05219:Bladder cancer                              | 5 | 3.05 | 0.009603085 | HRAS, MAP2K1, SRC, MMP1, DAPK1               |
| hsa00520:Amino sugar and nucleotide sugar metabolism | 5 | 3.05 | 0.01652896  | GPI, UAP1, GCK, HEXB, HK1                    |
| hsa05134:Legionellosis                               | 5 | 3.05 | 0.024457365 | CASP3, HSPA1A, APAF1, CASP1, HSPA8           |
| hsa00010:Glycolysis / Gluconeogenesis                | 5 | 3.05 | 0.048435003 | GPI, GCK, ADH5, HK1, PCK1                    |
| hsa04115:p53 signaling pathway                       | 5 | 3.05 | 0.048435003 | CASP3, CHEK1, CDK6, APAF1, CDK2              |
| hsa03320:PPAR signaling pathway                      | 5 | 3.05 | 0.048435003 | PPARA, PDPK1, FABP4, MMP1, PCK1              |
| hsa05100:Bacterial invasion of epithelial cells      | 5 | 3.05 | 0.076097284 | CDC42, MET, RHOA, PIK3R1, SRC                |
| hsa04666:Fc gamma R-mediated phagocytosis            | 5 | 3.05 | 0.093913818 | CDC42, MAP2K1, HCK, PIK3R1, AKT2             |

|                                                    |     |      |             |                                      |
|----------------------------------------------------|-----|------|-------------|--------------------------------------|
| hsa04922:Glucagon signaling pathway                | 5   | 3.05 | 0.145974746 | PPARA, GCK, PFKFB1, AKT2, PCK1       |
| hsa04114:Oocyte meiosis                            | 5   | 3.05 | 0.185715469 | AR, MAP2K1, AURKA, PPP1CC, CDK2      |
| hsa04725:Cholinergic synapse                       | 5   | 3.05 | 0.194059066 | HRAS, MAP2K1, JAK2, PIK3R1, AKT2     |
| hsa04670:Leukocyte transendothelial migration      | 5   | 3.05 | 0.2241284   | CDC42, MAPK12, MAPK14, RHOA, PIK3R1  |
| hsa04530:Tight junction                            | 5   | 3.05 | 0.310567539 | CDC42, HRAS, RHOA, SRC, AKT2         |
| hsa04630:Jak-STAT signaling pathway                | 5   | 3.05 | 0.348066889 | PIM1, JAK2, PIK3R1, AKT2, IL2        |
| hsa04261:Adrenergic signaling in cardiomyocytes    | 5   | 3.05 | 0.352768104 | MAPK12, MAPK14, PPP1CC, PIK3R1, AKT2 |
| hsa05010:Alzheimer's disease                       | 5   | 3.05 | 0.455241776 | CASP3, GSK3B, BACE1, MME, APAF1      |
| hsa05034:Alcoholism                                | 5   | 3.05 | 0.495796526 | HRAS, MAP2K1, PPP1CC, HDAC8, PKIA    |
| hsa04060:Cytokine-cytokine receptor interaction    | 5   | 3.05 | 0.701793794 | MET, PDGFRB, KIT, KDR, IL2           |
| hsa00670:One carbon pool by folate                 | 4   | 2.44 | 0.00749634  | TYMS, DHFR, ATIC, GART               |
| hsa00051:Fructose and mannose metabolism           | 4   | 2.44 | 0.027281939 | SORD, PFKFB1, AKR1B1, HK1            |
| hsa05340:Primary immunodeficiency                  | 4   | 2.44 | 0.031956097 | LCK, TAP1, ZAP70, BTK                |
| hsa04960:Aldosterone-regulated sodium reabsorption | 4   | 2.44 | 0.045342186 | PDPK1, NR3C2, INSR, PIK3R1           |
| hsa00983:Drug metabolism other enzymes             | - 4 | 2.44 | 0.06798725  | UMPS, UCK2, HPRT1, IMPDH2            |

|                                                |   |      |             |                               |
|------------------------------------------------|---|------|-------------|-------------------------------|
| hsa04923:Regulation of lipolysis in adipocytes | 4 | 2.44 | 0.107414442 | FABP4, INSR, PIK3R1, AKT2     |
| hsa04150:mTOR signaling pathway                | 4 | 2.44 | 0.116176987 | PDPK1, RHEB, PIK3R1, AKT2     |
| hsa04210:Apoptosis                             | 4 | 2.44 | 0.134466481 | CASP3, APAF1, PIK3R1, AKT2    |
| hsa04610:Complement and coagulation cascades   | 4 | 2.44 | 0.168621577 | F11, FGG, F2, PLAU            |
| hsa04622:RIG-I-like receptor signaling pathway | 4 | 2.44 | 0.173694917 | MAPK12, MAPK14, MAPK8, MAPK10 |
| hsa01230:Biosynthesis of amino acids           | 4 | 2.44 | 0.194401323 | BCAT2, OTC, PAH, CBS          |
| hsa04612:Antigen processing and presentation   | 4 | 2.44 | 0.20497765  | HSP90AA1, TAP1, HSPA1A, HSPA8 |
| hsa04064:NF-kappa B signaling pathway          | 4 | 2.44 | 0.265120167 | LCK, ZAP70, PLAU, BTK         |
| hsa05323:Rheumatoid arthritis                  | 4 | 2.44 | 0.270708151 | CTSK, TEK, MMP3, MMP1         |
| hsa04540:Gap junction                          | 4 | 2.44 | 0.270708151 | HRAS, MAP2K1, PDGFRB, SRC     |
| hsa04972:Pancreatic secretion                  | 4 | 2.44 | 0.298821122 | BST1, RHOA, RAB11A, CA2       |
| hsa04916:Melanogenesis                         | 4 | 2.44 | 0.338414923 | HRAS, MAP2K1, GSK3B, KIT      |
| hsa04723:Retrograde endocannabinoid signaling  | 4 | 2.44 | 0.344071398 | MAPK12, MAPK14, MAPK8, MAPK10 |
| hsa01200:Carbon metabolism                     | 4 | 2.44 | 0.411366851 | GPI, GCK, ADH5, HK1           |
| hsa04310:Wnt signaling pathway                 | 4 | 2.44 | 0.543068013 | GSK3B, RHOA, MAPK8, MAPK10    |



|                                                                    |   |      |             |                        |
|--------------------------------------------------------------------|---|------|-------------|------------------------|
| hsa05202:Transcriptional misregulation in cancer                   | 4 | 2.44 | 0.676455682 | ELANE, MET, MMP3, PLAU |
| hsa00760:Nicotinate and nicotinamide metabolism                    | 3 | 1.83 | 0.118870284 | NT5M, BST1, NMNAT1     |
| hsa05216:Thyroid cancer                                            | 3 | 1.83 | 0.118870284 | HRAS, MAP2K1, NCOA4    |
| hsa00052:Galactose metabolism                                      | 3 | 1.83 | 0.125717971 | GCK, AKR1B1, HK1       |
| hsa00500:Starch and sucrose metabolism                             | 3 | 1.83 | 0.14678674  | GPI, GCK, HK1          |
| hsa00270:Cysteine and methionine metabolism                        | 3 | 1.83 | 0.183284376 | BHMT, MTAP, CBS        |
| hsa04973:Carbohydrate digestion and absorption                     | 3 | 1.83 | 0.213332617 | HK1, PIK3R1, AKT2      |
| hsa04961:Endocrine and other factor-regulated calcium reabsorption | 3 | 1.83 | 0.236164348 | VDR, ESR1, RAB11A      |
| hsa04913:Ovarian steroidogenesis                                   | 3 | 1.83 | 0.266790581 | AKR1C3, HSD17B1, INSR  |
| hsa05130:Pathogenic Escherichia coli infection                     | 3 | 1.83 | 0.28211772  | CDC42, RHOA, ABL1      |
| hsa04720:Long-term potentiation                                    | 3 | 1.83 | 0.394844465 | HRAS, MAP2K1, PPP1CC   |
| hsa05140:Leishmaniasis                                             | 3 | 1.83 | 0.430766143 | MAPK12, MAPK14, JAK2   |
| hsa05146:Amoebiasis                                                | 3 | 1.83 | 0.645350482 | CASP3, RAB5A, PIK3R1   |
| hsa04726:Serotonergic synapse                                      | 3 | 1.83 | 0.67024668  | CASP3, HRAS, MAP2K1    |

---

|                                         |        |   |      |             |                      |
|-----------------------------------------|--------|---|------|-------------|----------------------|
| hsa04270:Vascular<br>muscle contraction | smooth | 3 | 1.83 | 0.70714025  | MAP2K1, RHOA, PPP1CC |
| hsa04145:Phagosome                      |        | 3 | 1.83 | 0.827590169 | TAP1, RAB5A, EEA1    |

---

**Table S7.** The KEGG pathway enrichment analysis for EGCG.

| KEGG_PATHWAY                               | Count | Percentage (%) | pValue   | Genes                                                                                                                                                                                                                                                                               |
|--------------------------------------------|-------|----------------|----------|-------------------------------------------------------------------------------------------------------------------------------------------------------------------------------------------------------------------------------------------------------------------------------------|
| hsa01100:Metabolic pathways                | 44    | 29.53          | 8.15E-06 | BCAT2, IMPA1, SORD, PNMT, HMGCR, HSD17B1, DTYMK, DCK, ADH5, HK1, LSS, PAH, HPRT1, AKR1C3, TYMS, NT5M, DHODH, SPR, UCK2, HADH, AMD1, AMY2A, HPGDS, UAP1, FECH, BST1, PCK1, GART, NME2, DHFR, GCK, RFK, PYGL, ADK, AKR1B1, BHMT, PLA2G2A, HSD11B1, MTAP, LTA4H, OAT, ABO, NMNAT1, DUT |
| hsa05200:Pathways in cancer                | 19    | 12.75          | 0.000276 | HSP90AB1, FGFR1, AR, HRAS, PPARD, HSP90AA1, RXRB, RXRA, TGFBR1, MET, MAPK10, MMP1, CDK2, DAPK1, MAPK1, CASP3, GSK3B, RARB, AKT2                                                                                                                                                     |
| hsa04151:PI3K-Akt signaling pathway        | 18    | 12.08          | 0.000174 | HSP90AB1, FGFR1, HRAS, HSP90AA1, RXRA, MET, CDK2, EPHA2, KDR, PCK1, MAPK1, PDPK1, GSK3B, TEK, JAK2, INSR, AKT2, SYK                                                                                                                                                                 |
| hsa04919:Thyroid hormone signaling pathway | 13    | 8.72           | 9.94E-07 | MAPK1, PDPK1, NCOA1, HRAS, THRA, NCOA2, THRB, RXRB, GSK3B, RXRA, ESR1, SRC, AKT2                                                                                                                                                                                                    |
| hsa04910:Insulin signaling pathway         | 13    | 8.72           | 7.54E-06 | HRAS, HK1, MAPK10, PPP1CC, PCK1, MAPK1, PDPK1, GCK, PYGL, GSK3B, PTPN1, INSR, AKT2                                                                                                                                                                                                  |

|                                      |    |      |          |                                                                                     |
|--------------------------------------|----|------|----------|-------------------------------------------------------------------------------------|
| hsa04014:Ras signaling pathway       | 13 | 8.72 | 0.000867 | FGFR1, HRAS, MET, MAPK10, EPHA2, KDR, MAPK1, TEK, ZAP70, PLA2G2A, RAB5A, INSR, AKT2 |
| hsa04931:Insulin resistance          | 12 | 8.05 | 3.99E-06 | NR1H2, PPARA, PDPK1, PYGL, GSK3B, PTPN1, MAPK10, PPP1CC, INSR, AKT2, PCK1, NR1H3    |
| hsa05152:Tuberculosis                | 12 | 8.05 | 0.000385 | MAPK1, VDR, CASP3, MAPK14, CD209, RAB5A, EEA1, JAK2, MAPK10, SRC, AKT2, SYK         |
| hsa05205:Proteoglycans in cancer     | 12 | 8.05 | 0.001073 | MAPK1, FGFR1, PDPK1, CASP3, HRAS, MAPK14, MET, ESR1, PPP1CC, SRC, KDR, AKT2         |
| hsa01130:Biosynthesis of antibiotics | 12 | 8.05 | 0.001719 | UAP1, NME2, BCAT2, GCK, HMGCR, ADH5, HK1, LSS, HADH, OAT, GART, PCK1                |
| hsa04015:Rap1 signaling pathway      | 11 | 7.38 | 0.00513  | MAPK1, FGFR1, HRAS, MAPK14, TEK, MET, INSR, SRC, EPHA2, KDR, AKT2                   |
| hsa03320:PPAR signaling pathway      | 10 | 6.71 | 3.13E-06 | PPARA, PDPK1, PPARD, RXRB, RXRA, FABP7, MMP1, FABP6, PCK1, NR1H3                    |
| hsa04917:Prolactin signaling pathway | 10 | 6.71 | 5.13E-06 | MAPK1, HRAS, GCK, MAPK14, GSK3B, ESR1, JAK2, MAPK10, SRC, AKT2                      |
| hsa05215:Prostate cancer             | 10 | 6.71 | 3.03E-05 | HSP90AB1, MAPK1, FGFR1, AR, PDPK1, HRAS, HSP90AA1, GSK3B, CDK2, AKT2                |
| hsa05160:Hepatitis C                 | 10 | 6.71 | 0.00072  | MAPK1, PPARA, PDPK1, HRAS, MAPK14, RXRA, GSK3B, MAPK10, AKT2, NR1H3                 |
| hsa04068:FoxO signaling pathway      | 10 | 6.71 | 0.00076  | MAPK1, PDPK1, HRAS, MAPK14, TGFBR1, MAPK10, INSR, CDK2, AKT2, PCK1                  |

|                                                       |    |      |          |                                                                    |
|-------------------------------------------------------|----|------|----------|--------------------------------------------------------------------|
| hsa00230:Purine metabolism                            | 10 | 6.71 | 0.004956 | NME2, GMPR2, NT5M, ADK, PDE4B, PDE5A, DCK, PDE4D, HPRT1, GART      |
| hsa04510:Focal adhesion                               | 10 | 6.71 | 0.013318 | MAPK1, PDPK1, HRAS, GSK3B, MET, MAPK10, PPP1CC, SRC, KDR, AKT2     |
| hsa05204:Chemical carcinogenesis                      | 9  | 6.04 | 9.98E-05 | GSTM1, GSTA1, GSTM2, GSTA3, SULT2A1, SULT1A1, HSD11B1, ADH5, GSTP1 |
| hsa04914:Progesterone-mediated oocyte maturation      | 9  | 6.04 | 0.000181 | HSP90AB1, PGR, MAPK1, HSP90AA1, MAPK14, MAPK10, CCNA2, CDK2, AKT2  |
| hsa04660:T cell receptor signaling pathway            | 9  | 6.04 | 0.000576 | ITK, MAPK1, PDPK1, HRAS, MAPK14, GSK3B, LCK, ZAP70, AKT2           |
| hsa05161:Hepatitis B                                  | 9  | 6.04 | 0.005079 | MAPK1, CASP3, HRAS, TGFBR1, MAPK10, CCNA2, SRC, CDK2, AKT2         |
| hsa04010:MAPK signaling pathway                       | 9  | 6.04 | 0.096831 | MAPK1, FGFR1, CASP3, HRAS, MAPK14, TGFBR1, MAPK10, MAPKAPK2, AKT2  |
| hsa00980:Metabolism of xenobiotics by cytochrome P450 | 8  | 5.37 | 0.000389 | GSTM1, GSTA1, GSTM2, GSTA3, SULT2A1, HSD11B1, ADH5, GSTP1          |
| hsa00240:Pyrimidine metabolism                        | 8  | 5.37 | 0.002914 | TYMS, NME2, NT5M, DTYMK, DHODH, DCK, UCK2, DUT                     |
| hsa04722:Neurotrophin signaling pathway               | 8  | 5.37 | 0.006413 | MAPK1, PDPK1, HRAS, MAPK14, GSK3B, MAPK10, MAPKAPK2, AKT2          |
| hsa04380:Osteoclast differentiation                   | 8  | 5.37 | 0.010199 | MAPK1, CTSK, MAPK14, TGFBR1, LCK, MAPK10, AKT2, SYK                |
| hsa04932:Non-alcoholic fatty liver disease (NAFLD)    | 8  | 5.37 | 0.020895 | PPARA, CASP3, RXRA, GSK3B, MAPK10, INSR, AKT2, NR1H3               |
| hsa05203:Viral carcinogenesis                         | 8  | 5.37 | 0.082908 | MAPK1, CASP3, HRAS, MAPKAPK2, CCNA2, SRC, CDK2, SYK                |

|                                                                   |   |     |          |                                                  |
|-------------------------------------------------------------------|---|-----|----------|--------------------------------------------------|
| hsa05223:Non-small cell lung cancer                               | 7 | 4.7 | 0.000524 | MAPK1, PDPK1, HRAS, RXRB, RXRA, RARB, AKT2       |
| hsa04370:VEGF signaling pathway                                   | 7 | 4.7 | 0.000832 | MAPK1, HRAS, MAPK14, MAPKAPK2, SRC, KDR, AKT2    |
| hsa05230:Central carbon metabolism in cancer                      | 7 | 4.7 | 0.001074 | MAPK1, FGFR1, HRAS, GCK, MET, HK1, AKT2          |
| hsa04664:Fc epsilon RI signaling pathway                          | 7 | 4.7 | 0.001476 | MAPK1, PDPK1, HRAS, MAPK14, MAPK10, AKT2, SYK    |
| hsa04920:Adipocytokine signaling pathway                          | 7 | 4.7 | 0.001717 | PPARA, RXRB, RXRA, JAK2, MAPK10, AKT2, PCK1      |
| hsa04520:Adherens junction                                        | 7 | 4.7 | 0.001847 | MAPK1, FGFR1, TGFBR1, MET, PTPN1, INSR, SRC      |
| hsa04915:Estrogen signaling pathway                               | 7 | 4.7 | 0.009535 | HSP90AB1, MAPK1, HRAS, HSP90AA1, ESR1, SRC, AKT2 |
| hsa05145:Toxoplasmosis                                            | 7 | 4.7 | 0.02119  | MAPK1, PDPK1, CASP3, MAPK14, JAK2, MAPK10, AKT2  |
| hsa04611:Platelet activation                                      | 7 | 4.7 | 0.032161 | MAPK1, FGG, MAPK14, PPP1CC, SRC, AKT2, SYK       |
| hsa04550:Signaling pathways regulating pluripotency of stem cells | 7 | 4.7 | 0.04372  | MAPK1, FGFR1, HRAS, MAPK14, GSK3B, JAK2, AKT2    |
| hsa05164:Influenza A                                              | 7 | 4.7 | 0.100629 | MAPK1, MAPK14, GSK3B, JAK2, MAPK10, CASP1, AKT2  |
| hsa04062:Chemokine signaling pathway                              | 7 | 4.7 | 0.127135 | ITK, MAPK1, HRAS, GSK3B, JAK2, SRC, AKT2         |

|                                                    |   |      |          |                                                  |
|----------------------------------------------------|---|------|----------|--------------------------------------------------|
| hsa05169:Epstein-Barr virus infection              | 7 | 4.7  | 0.136664 | MAPK14, GSK3B, MAPK10, CCNA2, CDK2, AKT2, SYK    |
| hsa04024:cAMP signaling pathway                    | 7 | 4.7  | 0.156698 | MAPK1, PPARA, PDE4B, PDE4D, MAPK10, PPP1CC, AKT2 |
| hsa04144:Endocytosis                               | 7 | 4.7  | 0.337461 | HRAS, TGFBR1, MET, RAB5A, EEA1, SRC, KDR         |
| hsa04621:NOD-like receptor signaling pathway       | 6 | 4.03 | 0.003233 | HSP90AB1, MAPK1, HSP90AA1, MAPK14, MAPK10, CASP1 |
| hsa05210:Colorectal cancer                         | 6 | 4.03 | 0.005431 | MAPK1, CASP3, TGFBR1, GSK3B, MAPK10, AKT2        |
| hsa00982:Drug metabolism - cytochrome P450         | 6 | 4.03 | 0.008019 | GSTM1, GSTA1, GSTM2, GSTA3, ADH5, GSTP1          |
| hsa04012:ErbB signaling pathway                    | 6 | 4.03 | 0.021602 | MAPK1, HRAS, GSK3B, MAPK10, SRC, AKT2            |
| hsa04668:TNF signaling pathway                     | 6 | 4.03 | 0.045134 | MAPK1, CASP3, MAPK14, MAPK10, MMP3, AKT2         |
| hsa04114:Oocyte meiosis                            | 6 | 4.03 | 0.049855 | PGR, MAPK1, AR, AURKA, PPP1CC, CDK2              |
| hsa04071:Sphingolipid signaling pathway            | 6 | 4.03 | 0.069573 | MAPK1, PDPK1, HRAS, MAPK14, MAPK10, AKT2         |
| hsa04650:Natural killer cell mediated cytotoxicity | 6 | 4.03 | 0.073563 | MAPK1, CASP3, HRAS, LCK, ZAP70, SYK              |
| hsa04152:AMPK signaling pathway                    | 6 | 4.03 | 0.073563 | PDPK1, HMGCR, CCNA2, INSR, AKT2, PCK1            |
| hsa05168:Herpes simplex infection                  | 6 | 4.03 | 0.24628  | CASP3, TAP1, JAK2, MAPK10, PPP1CC, CDK2          |
| hsa04810:Regulation of actin cytoskeleton          | 6 | 4.03 | 0.346669 | MAPK1, FGFR1, HRAS, F2, PPP1CC, SRC              |
| hsa05219:Bladder cancer                            | 5 | 3.36 | 0.006516 | MAPK1, HRAS, SRC, MMP1, DAPK1                    |

|                                                                     |   |      |          |                                     |
|---------------------------------------------------------------------|---|------|----------|-------------------------------------|
| hsa04930:Type II diabetes mellitus                                  | 5 | 3.36 | 0.011347 | MAPK1, GCK, HK1, MAPK10, INSR       |
| hsa00480:Glutathione metabolism                                     | 5 | 3.36 | 0.013974 | GSTM1, GSTA1, GSTM2, GSTA3, GSTP1   |
| hsa05213:Endometrial cancer                                         | 5 | 3.36 | 0.014928 | MAPK1, PDPK1, HRAS, GSK3B, AKT2     |
| hsa05221:Acute myeloid leukemia                                     | 5 | 3.36 | 0.019152 | MAPK1, PPARD, HRAS, PIM1, AKT2      |
| hsa05120:Epithelial cell signaling in Helicobacter pylori infection | 5 | 3.36 | 0.0343   | CASP3, MAPK14, MET, MAPK10, SRC     |
| hsa04662:B cell receptor signaling pathway                          | 5 | 3.36 | 0.037631 | MAPK1, HRAS, GSK3B, AKT2, SYK       |
| hsa05218:Melanoma                                                   | 5 | 3.36 | 0.041141 | MAPK1, FGFR1, HRAS, MET, AKT2       |
| hsa05133:Pertussis                                                  | 5 | 3.36 | 0.048701 | MAPK1, CASP3, MAPK14, MAPK10, CASP1 |
| hsa05222:Small cell lung cancer                                     | 5 | 3.36 | 0.070721 | RXRΒ, RXRA, RARB, CDK2, AKT2        |
| hsa04912:GnRH signaling pathway                                     | 5 | 3.36 | 0.086008 | MAPK1, HRAS, MAPK14, MAPK10, SRC    |
| hsa04066:HIF-1 signaling pathway                                    | 5 | 3.36 | 0.105698 | MAPK1, TEK, HK1, INSR, AKT2         |
| hsa04922:Glucagon signaling pathway                                 | 5 | 3.36 | 0.108666 | PPARA, GCK, PYGL, AKT2, PCK1        |
| hsa05231:Choline metabolism in cancer                               | 5 | 3.36 | 0.114714 | MAPK1, PDPK1, HRAS, MAPK10, AKT2    |
| hsa05142:Chagas disease (American trypanosomiasis)                  | 5 | 3.36 | 0.124059 | MAPK1, MAPK14, TGFBR1, MAPK10, AKT2 |
| hsa04620:Toll-like receptor signaling pathway                       | 5 | 3.36 | 0.130465 | MAPK1, CTSK, MAPK14, MAPK10, AKT2   |
| hsa04360:Axon guidance                                              | 5 | 3.36 | 0.205029 | MAPK1, HRAS, GSK3B, MET, EPHA2      |
| hsa04728:Dopaminergic synapse                                       | 5 | 3.36 | 0.20886  | MAPK14, GSK3B, MAPK10, PPP1CC, AKT2 |
| hsa05162:Measles                                                    | 5 | 3.36 | 0.228314 | GSK3B, CD209, JAK2, CDK2, AKT2      |



|                                                      |   |      |          |                                   |
|------------------------------------------------------|---|------|----------|-----------------------------------|
| hsa04022:cGMP-PKG signaling pathway                  | 5 | 3.36 | 0.364359 | MAPK1, PDE5A, PPP1CC, INSR, AKT2  |
| hsa05010:Alzheimer's disease                         | 5 | 3.36 | 0.372768 | MAPK1, CASP3, GSK3B, BACE1, MME   |
| hsa05202:Transcriptional misregulation in cancer     | 5 | 3.36 | 0.372768 | RXRB, RXRA, ELANE, MET, MMP3      |
| hsa05166:HTLV-I infection                            | 5 | 3.36 | 0.698634 | HRAS, TGFBR1, GSK3B, LCK, AKT2    |
| hsa05216:Thyroid cancer                              | 4 | 2.68 | 0.015636 | MAPK1, HRAS, RXRB, RXRA           |
| hsa00500:Starch and sucrose metabolism               | 4 | 2.68 | 0.022142 | GCK, PYGL, HK1, AMY2A             |
| hsa04960:Aldosterone-regulated sodium reabsorption   | 4 | 2.68 | 0.034269 | MAPK1, PDPK1, NR3C2, INSR         |
| hsa00520:Amino sugar and nucleotide sugar metabolism | 4 | 2.68 | 0.057649 | UAP1, GCK, HK1, CHIT1             |
| hsa05014:Amyotrophic lateral sclerosis (ALS)         | 4 | 2.68 | 0.063649 | CASP3, MAPK14, RAB5A, CASP1       |
| hsa00140:Steroid hormone biosynthesis                | 4 | 2.68 | 0.090339 | AKR1C3, HSD17B1, HSD11B1, SULT2B1 |
| hsa00590:Arachidonic acid metabolism                 | 4 | 2.68 | 0.105171 | AKR1C3, PLA2G2A, LTA4H, HPGDS     |
| hsa05131:Shigellosis                                 | 4 | 2.68 | 0.112924 | MAPK1, MAPK14, MAPK10, SRC        |
| hsa05212:Pancreatic cancer                           | 4 | 2.68 | 0.116881 | MAPK1, TGFBR1, MAPK10, AKT2       |
| hsa05211:Renal cell carcinoma                        | 4 | 2.68 | 0.116881 | MAPK1, HRAS, MET, AKT2            |
| hsa00010:Glycolysis / Gluconeogenesis                | 4 | 2.68 | 0.124949 | GCK, ADH5, HK1, PCK1              |
| hsa04976:Bile secretion                              | 4 | 2.68 | 0.133212 | SULT2A1, HMGCR, RXRA, CA2         |
| hsa05220:Chronic myeloid                             | 4 | 2.68 | 0.145953 | MAPK1, HRAS, TGFBR1, AKT2         |

|                                                           |   |      |          |                              |  |
|-----------------------------------------------------------|---|------|----------|------------------------------|--|
| leukemia                                                  |   |      |          |                              |  |
| hsa05132:Salmonella infection                             | 4 | 2.68 | 0.195681 | MAPK1, MAPK14, MAPK10, CASP1 |  |
| hsa05323:Rheumatoid arthritis                             | 4 | 2.68 | 0.219527 | CTSK, TEK, MMP3, MMP1        |  |
| hsa04750:Inflammatory mediator regulation of TRP channels | 4 | 2.68 | 0.268759 | MAPK14, MAPK10, PPP1CC, SRC  |  |
| hsa04725:Cholinergic synapse                              | 4 | 2.68 | 0.334308 | MAPK1, HRAS, JAK2, AKT2      |  |
| hsa04261:Adrenergic signaling in cardiomyocytes           | 4 | 2.68 | 0.505614 | MAPK1, MAPK14, PPP1CC, AKT2  |  |
| hsa04145:Phagosome                                        | 4 | 2.68 | 0.537327 | CD209, TAP1, RAB5A, EEA1     |  |
| hsa04921:Oxytocin signaling pathway                       | 4 | 2.68 | 0.55927  | MAPK1, HRAS, PPP1CC, SRC     |  |
| hsa05034:Alcoholism                                       | 4 | 2.68 | 0.636754 | MAPK1, HRAS, PPP1CC, PKIA    |  |
| hsa04080:Neuroactive ligand-receptor interaction          | 4 | 2.68 | 0.890019 | THRA, THRB, F2, NR3C1        |  |
| hsa05206:MicroRNAs in cancer                              | 4 | 2.68 | 0.901048 | CASP3, HRAS, MET, PIM1       |  |
| hsa00670:One carbon pool by folate                        | 3 | 2.01 | 0.051325 | TYMS, DHFR, GART             |  |
| hsa00760:Nicotinate and nicotinamide metabolism           | 3 | 2.01 | 0.098673 | NT5M, BST1, NMNAT1           |  |
| hsa00052:Galactose metabolism                             | 3 | 2.01 | 0.104497 | GCK, AKR1B1, HK1             |  |
| hsa00051:Fructose and mannose metabolism                  | 3 | 2.01 | 0.116413 | SORD, AKR1B1, HK1            |  |
| hsa05340:Primary immunodeficiency                         | 3 | 2.01 | 0.128653 | LCK, TAP1, ZAP70             |  |
| hsa00270:Cysteine and methionine metabolism               | 3 | 2.01 | 0.153952 | BHMT, MTAP, AMD1             |  |

|                                                |   |      |          |                          |
|------------------------------------------------|---|------|----------|--------------------------|
| hsa04973:Carbohydrate digestion and absorption | 3 | 2.01 | 0.18011  | HK1, AMY2A, AKT2         |
| hsa04913:Ovarian steroidogenesis               | 3 | 2.01 | 0.227222 | AKR1C3, HSD17B1, INSR    |
| hsa04150:mTOR signaling pathway                | 3 | 2.01 | 0.288789 | MAPK1, PDPK1, AKT2       |
| hsa05214:Glioma                                | 3 | 2.01 | 0.336387 | MAPK1, HRAS, AKT2        |
| hsa04720:Long-term potentiation                | 3 | 2.01 | 0.343121 | MAPK1, HRAS, PPP1CC      |
| hsa05140:Leishmaniasis                         | 3 | 2.01 | 0.376444 | MAPK1, MAPK14, JAK2      |
| hsa04612:Antigen processing and presentation   | 3 | 2.01 | 0.409067 | HSP90AB1, HSP90AA1, TAP1 |
| hsa04666:Fc gamma R-mediated phagocytosis      | 3 | 2.01 | 0.459475 | MAPK1, AKT2, SYK         |
| hsa04064:NF-kappa B signaling pathway          | 3 | 2.01 | 0.477738 | LCK, ZAP70, SYK          |
| hsa04974:Protein digestion and absorption      | 3 | 2.01 | 0.483743 | MME, PGA4, DPP4          |
| hsa04540:Gap junction                          | 3 | 2.01 | 0.483743 | MAPK1, HRAS, SRC         |
| hsa04972:Pancreatic secretion                  | 3 | 2.01 | 0.513124 | BST1, PLA2G2A, CA2       |
| hsa04916:Melanogenesis                         | 3 | 2.01 | 0.552388 | MAPK1, HRAS, GSK3B       |
| hsa04723:Retrograde endocannabinoid signalling | 3 | 2.01 | 0.557814 | MAPK1, MAPK14, MAPK10    |
| hsa04726:Serotonergic synapse                  | 3 | 2.01 | 0.609509 | MAPK1, CASP3, HRAS       |
| hsa01200:Carbon metabolism                     | 3 | 2.01 | 0.619285 | GCK, ADH5, HK1           |
| hsa04270:Vascular smooth muscle contraction    | 3 | 2.01 | 0.647493 | MAPK1, PLA2G2A, PPP1CC   |
| hsa04110:Cell cycle                            | 3 | 2.01 | 0.669727 | GSK3B, CCNA2, CDK2       |

|                                                      |   |      |          |                            |
|------------------------------------------------------|---|------|----------|----------------------------|
| hsa04530:Tight junction                              | 3 | 2.01 | 0.722283 | HRAS, SRC, AKT2            |
| hsa04310:Wnt signaling pathway                       | 3 | 2.01 | 0.726021 | PPARD, GSK3B, MAPK10       |
| hsa04630:Jak-STAT signaling pathway                  | 3 | 2.01 | 0.751023 | PIM1, JAK2, AKT2           |
| hsa04390:Hippo signaling pathway                     | 3 | 2.01 | 0.770881 | TGFBR1, GSK3B, PPP1CC      |
| hsa04141:Protein processing in endoplasmic reticulum | 3 | 2.01 | 0.822438 | HSP90AB1, HSP90AA1, MAPK10 |
| hsa04060:Cytokine-cytokine receptor interaction      | 3 | 2.01 | 0.928828 | TGFBR1, MET, KDR           |

## REFERENCE

1. Jing, W.; Chunhua, M.; Shumin, W., Effects of acteoside on lipopolysaccharide-induced inflammation in acute lung injury via regulation of NF-kappaB pathway in vivo and in vitro. *Toxicology and applied pharmacology* **2015**, *285* (2), 128-35.
2. Lee, J. Y.; Woo, E. R.; Kang, K. W., Inhibition of lipopolysaccharide-inducible nitric oxide synthase expression by acteoside through blocking of AP-1 activation. *Journal of ethnopharmacology* **2005**, *97* (3), 561-6.
3. Peng, X. M.; Gao, L.; Huo, S. X.; Liu, X. M.; Yan, M., The Mechanism of Memory Enhancement of Acteoside (Verbascoside) in the Senescent Mouse Model Induced by a Combination of D-gal and AlCl<sub>3</sub>. *Phytotherapy research : PTR* **2015**, *29* (8), 1137-44.
4. Hong, S.; Oh, G. W.; Kang, W. G.; Kim, O., Anticoccidial effects of the *Plantago asiatica* extract on experimental *Eimeria tenella* infection. *Laboratory animal research* **2016**, *32* (1), 65-9.
5. Ravn, H.; Nishibe, S.; Sasahara, M.; Li, X. B., Phenolic-Compounds From *Plantago-Asiatica*. *Phytochemistry* **1990**, *29* (11), 3627-3631.
6. Koo, K. A.; Kim, S. H.; Oh, T. H.; Kim, Y. C., Acteoside and its aglycones protect primary cultures of rat cortical cells from glutamate-induced excitotoxicity. *Life sciences* **2006**, *79* (7), 709-16.
7. Li, H. M.; Kim, J. K.; Jang, J. M.; Cui, C. B.; Lim, S. S., Analysis of the inhibitory activity of *Abeliophyllum distichum* leaf constituents against aldose reductase by using high-speed counter current chromatography. *Archives of pharmacal research* **2013**, *36* (9), 1104-12.
8. Yu, S. Y.; Lee, I. S.; Jung, S. H.; Lee, Y. M.; Lee, Y. R.; Kim, J. H.; Sun, H.; Kim, J. S., Caffeoylated phenylpropanoid glycosides from *Brandisia hancei* inhibit advanced glycation end product formation and aldose reductase in vitro and vessel dilation in larval zebrafish in vivo. *Planta medica* **2013**, *79* (18), 1705-9.
9. Lines, T. C.; Ono, M., FRS 1000, an extract of red onion peel, strongly inhibits phosphodiesterase 5A (PDE 5A). *Phytomedicine : international journal of phytotherapy and phytopharmacology* **2006**, *13* (4), 236-9.
10. Fridrich, D.; Teller, N.; Esselen, M.; Pahlke, G.; Marko, D., Comparison of delphinidin, quercetin and (-)-epigallocatechin-3-gallate as inhibitors of the EGFR and the ErbB2 receptor phosphorylation. *Molecular nutrition & food research* **2008**, *52* (7), 815-22.
11. Davies, S. P.; Reddy, H.; Caivano, M.; Cohen, P., Specificity and mechanism of action of some commonly used protein kinase inhibitors. *Biochem J* **2000**, *351*, 95-105.
12. Escande, C.; Nin, V.; Price, N. L.; Capellini, V.; Gomes, A. P.; Barbosa, M. T.; O'Neil, L.; White, T. A.; Sinclair, D. A.; Chini, E. N., Flavonoid Apigenin Is an Inhibitor of the NAD(+)ase CD38: Implications for Cellular NAD(+) Metabolism, Protein Acetylation, and Treatment of Metabolic Syndrome (vol 62, pg 1084, 2013). *Diabetes* **2014**, *63* (4), 1428-1428.
13. Kang, T. B.; Liang, N. C., Effect of quercetin on activities of protein kinase C and tyrosine protein kinase from HL-60 cells. *Acta Pharmacol Sin* **1997**, *18* (4), 374-376.
14. Chan, A. L. F.; Huang, H. L.; Chien, H. C.; Chen, C. M.; Lin, C. N.; Ko, W. C., Inhibitory effects of quercetin derivatives on phosphodiesterase isozymes and high-affinity [H-3]-rolipram binding in guinea pig tissues. *Invest New Drug* **2008**, *26* (5), 417-424.
15. Baron, B. W.; Thirman, M. J.; Giurcanu, M. C.; Baron, J. M., Quercetin Therapy for Selected Patients with PIM1 Kinase-Positive Chronic Lymphocytic Leukemia/Small Lymphocytic Lymphoma: A Pilot Study. *Acta Haematol-Basel* **2018**, *139* (2), 132-139.
16. van der Woude, H.; ter Veld, M. G. R.; Jacobs, N.; van der Saag, P. T.; Murk, A. J.; Rietjens, I. M. C.

M., The stimulation of cell proliferation by quercetin is mediated by the estrogen receptor. *Molecular nutrition & food research* **2005**, *49* (8), 763-771.

17. Lee, J. H.; Chung, K. Y.; Bang, D.; Lee, K. H., Searching for aging-related proteins in human dermal microvascular endothelial cells treated with anti-aging agents. *Proteomics* **2006**, *6* (4), 1351-1361.

18. Boly, R.; Gras, T.; Lamkami, T.; Guissou, P.; Serteyn, D.; Kiss, R.; Dubois, J., Quercetin inhibits a large panel of kinases implicated in cancer cell biology. *Int J Oncol* **2011**, *38* (3), 833-842.

19. Liu, Y.; Zhao, B.; Mao, G.; Fang, X.; Liu, Y.; Huang, Y.; Wang, N., Epigallocatechin-3-O-gallate, a green tea polyphenol, induces expression of pim-1 kinase via PPARgamma in human vascular endothelial cells. *Cardiovascular toxicology* **2013**, *13* (4), 391-5.

20. Lee, J. W.; Lee, Y. K.; Ban, J. O.; Ha, T. Y.; Yun, Y. P.; Han, S. B.; Oh, K. W.; Hong, J. T., Green Tea (-)-Epigallocatechin-3-Gallate Inhibits beta-Amyloid-Induced Cognitive Dysfunction through Modification of Secretase Activity via Inhibition of ERK and NF-kappa B Pathways in Mice. *J Nutr* **2009**, *139* (10), 1987-1993.

21. Landis-Piwowar, K.; Chen, D.; Chan, T. H.; Dou, Q. P., Inhibition of catechol-O-methyltransferase activity in human breast cancer cells enhances the biological effect of the green tea polyphenol (-)-EGCG. *Oncol Rep* **2010**, *24* (2), 563-569.

22. Lee, W. J.; Shim, J. Y.; Zhu, B. T., Mechanisms for the inhibition of DNA methyltransferases by tea catechins and bioflavonoids. *Molecular pharmacology* **2005**, *68* (4), 1018-1030.

23. Zheng, R.; Chen, T. S.; Lu, T., A comparative reverse docking strategy to identify potential antineoplastic targets of tea functional components and binding mode. *Int J Mol Sci* **2011**, *12* (8), 5200-12.

24. Chen, W. C.; Hsieh, S. R.; Chiu, C. H.; Hsu, B. D.; Liou, Y. M., Molecular identification for epigallocatechin-3-gallate-mediated antioxidant intervention on the H<sub>2</sub>O<sub>2</sub>-induced oxidative stress in H9c2 rat cardiomyoblasts. *Journal of biomedical science* **2014**, *21*, 56.

25. Lee, K., Transactivation of peroxisome proliferator-activated receptor alpha by green tea extracts. *Journal of veterinary science* **2004**, *5* (4), 325-30.

26. Ahmed, S.; Wang, N. Z.; Lalonde, M.; Goldberg, V. M.; Haqqi, T. M., Green tea polyphenol epigallocatechin-3-gallate (EGCG) differentially inhibits interleukin-1 beta-induced expression of matrix metalloproteinase-1 and-13 in human chondrocytes. *J Pharmacol Exp Ther* **2004**, *308* (2), 767-773.

27. Chow, H. H. S.; Hakim, I. A.; Vining, D. R.; Crowell, J. A.; Tome, M. E.; Ranger-Moore, J.; Cordova, C. A.; Mikhael, D. M.; Briehl, M. M.; Alberts, D. S., Modulation of human glutathione S-transferases by Polyphenon E intervention. *Cancer Epidem Biomar* **2007**, *16* (8), 1662-1666.
